# Supplementary material for: Highly Active Small Aminated Quinolinequinones against Drug-Resistant Staphylococcus aureus and Candida albicans
Source: MDPI journal article supplement (doi:10.3390/molecules27092923), 2022-05-03
Supplement: s1 [file s1]

# **Highly Active Small Aminated Quinolinequinones against Drug-Resistant *Staphylococcus aureus* and *Candida albicans***

**Hatice Yıldırım <sup>1</sup>, Nilüfer Bayrak <sup>1</sup>, Mahmut Yıldız <sup>2</sup>, Fatıma Nur Yılmaz <sup>3</sup>,  
Emel Mataracı-Kara <sup>3</sup>, Deepak Shilkar <sup>4</sup>, Venkatesan Jayaprakash <sup>4</sup>  
and Amaç Fatih TuYuN <sup>\*,5</sup>**

<sup>1</sup> *Department of Chemistry, Engineering Faculty, Istanbul University-Cerrahpasa, Avcılar, Istanbul 34320, Turkey*

<sup>2</sup> *Department of Chemistry, Gebze Technical University, Gebze, Kocaeli 41400, Turkey*

<sup>3</sup> *Department of Pharmaceutical Microbiology, Pharmacy Faculty, Istanbul University, Beyazıt, Istanbul 34116, Turkey*

<sup>4</sup> *Department of Pharmaceutical Sciences & Technology, Birla Institute of Technology, Mesra, Ranchi 835 215, Jharkhand, India*

<sup>5</sup> *Department of Chemistry, Faculty of Science, Istanbul University, Fatih, Istanbul 34116, Turkey*

\* Author to whom correspondence should be addressed; E-Mail: [aftuyun@gmail.com](mailto:aftuyun@gmail.com) or [aftuyun@istanbul.edu.tr](mailto:aftuyun@istanbul.edu.tr); Tel.: +90-212-440-0000.

## Contents

|                                                                                   |         |
|-----------------------------------------------------------------------------------|---------|
| The details of all crystallographic data of the <b>AQQ7</b> and <b>AQQ10</b>      | S3–S4   |
| Purity chromatograms of the aminated QQs ( <b>AQQ1–16</b> )                       | S5–S12  |
| <sup>1</sup> H and <sup>13</sup> C spectra of the aminated QQs ( <b>AQQ1–16</b> ) | S13–S28 |

**Table S1.** Selected bond lengths (Å) with e.s.d in parantheses for the **AQQ7** and **AQQ10**.

| <b>AQQ7</b> |            |          |          | <b>AQQ10</b> |           |          |           |
|-------------|------------|----------|----------|--------------|-----------|----------|-----------|
| C11-C9      | 1.7304(18) | C5-C6    | 1.382(3) | C11-C8       | 1.726(6)  | C17-C19  | 1.291(17) |
| O2-C10      | 1.225(2)   | C16-C17  | 1.495(3) | N1-C10       | 1.321(9)  | C19-H19A | 0.96      |
| N1-C5       | 1.420(2)   | C17-H17A | 0.96     | C10-C5       | 1.379(9)  | O1-C9    | 1.205(8)  |
| N2-C11      | 1.329(2)   | O2-C13   | 1.219(2) | O2-C6        | 1.221(8)  | N1-C2    | 1.354(9)  |
| C1-H1B      | 0.96       | N2-C16   | 1.334(3) | N2-C11       | 1.432(9)  | C8-C7    | 1.364(9)  |
| C3-C4       | 1.380(3)   | C12-C11  | 1.394(2) | C11-C16      | 1.354(10) | N2-C7    | 1.341(9)  |
| C15-C16     | 1.395(3)   | C8-C9    | 1.374(2) | C18-C17      | 1.408(18) | C4-C3    | 1.366(12) |

**Table S2.** Selected bond angles (°) with e.s.d in parantheses for the **AQQ7** and **AQQ10**.

| <b>AQQ7</b>  |            |             |            | <b>AQQ10</b> |          |               |          |
|--------------|------------|-------------|------------|--------------|----------|---------------|----------|
| H1A-C1-H1B   | 109.5      | O2-C10-C9   | 122.89(17) | C10-N1-C2    | 118.3(7) | C19-C17-H17   | 91.0     |
| C15-C14-C12  | 118.70(19) | C9-C10-C11  | 118.08(15) | C9-C8-C11    | 114.1(5) | C5-C10-C9     | 119.9(6) |
| C4-C5-C6     | 120.20(18) | C2-C7-C6    | 121.4(2)   | C10-C5-C6    | 121.6(6) | C7-C8-C11     | 121.1(5) |
| N1-C8-C13    | 112.70(15) | C11-N2-C16  | 118.01(18) | O1-C9-C8     | 121.7(6) | C10-C5-C4     | 118.1(7) |
| C5-C6-C7     | 119.4(2)   | C5-C4-C3    | 119.6(2)   | C5-C6-C7     | 119.3(6) | C4-C5-C6      | 120.4(7) |
| O2-C13-C8    | 119.26(17) | C4-C5-N1    | 118.83(17) | C16-C11-C12  | 120.9(7) | O1-C9-C10     | 121.3(6) |
| N2-C16-C15   | 121.98(19) | C9-C8-C13   | 118.24(16) | C12-C11-N2   | 120.9(7) | C7-N2-C11     | 131.1(6) |
| C11-C12-C13  | 120.79(16) | O2-C13-C12  | 121.72(17) | C11-C16-C15  | 119.1(8) | C14-C15-C16   | 121.2(8) |
| C7-C2-C3     | 118.02(19) | C14-C12-C13 | 121.35(17) | N2-C7-C6     | 112.3(6) | N1-C2-C3      | 120.4(8) |
| C8-C9-C11    | 121.71(14) | O2-C10-C11  | 119.02(17) | H1B-C1-H1C   | 109.5    | C8-C7-C6      | 117.2(6) |
| H17A-C17-17B | 109.5      | C12-C11-C10 | 119.71(16) | C17-C18-H18B | 109.5    | H18A-C18-H18C | 109.5    |

**Table S3.** Selected torsion angles (°) with e.s.d in parantheses for the **AQQ7** and **AQQ10**.

| <b>AQQ7</b>     |             |                |             | <b>AQQ10</b>  |           |                 |           |
|-----------------|-------------|----------------|-------------|---------------|-----------|-----------------|-----------|
| C2-C3-C4-C5     | 0.1(4)      | C8-C9-C10-O2   | 176.43(17)  | C2-N1-C10-C5  | -3.0(9)   | C12-C11-C16-C15 | 1.7(11)   |
| N1-C8-C13-O2    | -1.6(2)     | C16-N2-C11-C12 | 0.6(3)      | N1-C10-C5-C4  | 3.7(9)    | C14-C15-C16-C11 | 0.1(12)   |
| N1-C8-C13-C12   | 177.66(15)  | O2-C10-C11-C12 | 176.46(17)  | N1-C10-C5-C6  | -176.3(6) | C6-C5-C4-C3     | 179.1(6)  |
| C11-N2-C16-C15  | -3.3(3)     | C3-C4-C5-N1    | -177.8(2)   | C7-C8-C9-O1   | 177.0(7)  | C11-C8-C7-N2    | -3.9(10)  |
| C14-C15-C16-N2  | 3.4(3)      | C13-C8-C9-C11  | -169.66(12) | C7-C8-C9-C10  | -0.8(9)   | C11-C8-C7-C6    | 170.8(5)  |
| C15-C14-C12-C11 | -1.6(3)     | C11-C9-C10-O2  | -5.6(2)     | N1-C10-C9-O1  | 2.1(9)    | C1-C2-C3-C4     | -175.6(8) |
| O1-C13-C12-C11  | 177.16(18)  | C16-N2-C11-C10 | -178.64(16) | N1-C10-C9-C8  | 180.0(6)  | C2-N1-C10-C9    | 179.9(6)  |
| N1-C8-C9-C10    | -174.65(17) | C1-C2-C7-C6    | 178.9(2)    | C10-C5-C6-O2  | 174.4(6)  | N2-C11-C16-C15  | 176.2(7)  |
| C9-C10-C11-N2   | 176.99(15)  | C9-C10-C11-N2  | 176.99(15)  | C7-N2-C11-C16 | 144.6(7)  | C16-C15-C14-C13 | -1.8(12)  |
| C13-C12-C11-C10 | 5.5(2)      | C13-C12-C11-N2 | -173.78(16) | C10-N1-C2-C3  | -0.5(11)  | O2-C6-C7-C8     | -172.8(6) |
| C5-N1-C8-C9     | 21.7(3)     | N1-C8-C9-C11   | 7.5(3)      | C11-N2-C7-C8  | -23.4(12) | C11-C8-C9-O1    | 1.7(9)    |
| C8-N1-C5-C6     | 44.8(3)     | O2-C10-C11-N2  | -4.2(2)     | C11-N2-C7-C6  | 161.7(6)  | O2-C6-C7-N2     | 2.9(9)    |

**Table S4.** Hydrogen bond distances (Å) and angles (°) for the **AQQ7** and **AQQ10**.

| <b>AQQ7</b> |                |                   |                       |              | <b>AQQ10</b> |                |                   |                       |              |
|-------------|----------------|-------------------|-----------------------|--------------|--------------|----------------|-------------------|-----------------------|--------------|
|             | <b>Donor-H</b> | <b>Acceptor-H</b> | <b>Donor-Acceptor</b> | <b>Angle</b> |              | <b>Donor-H</b> | <b>Acceptor-H</b> | <b>Donor-Acceptor</b> | <b>Angle</b> |
| N1-H1...O2  | 0.86           | 2.10              | 2.878(2)              | 150.9        | C16-H16...O1 | 0.93           | 2.64              | 3.472(10)             | 148.6        |
| N1-H1...Cl1 | 0.86           | 2.89              | 3.5412(16)            | 134.2        |              |                |                   |                       |              |

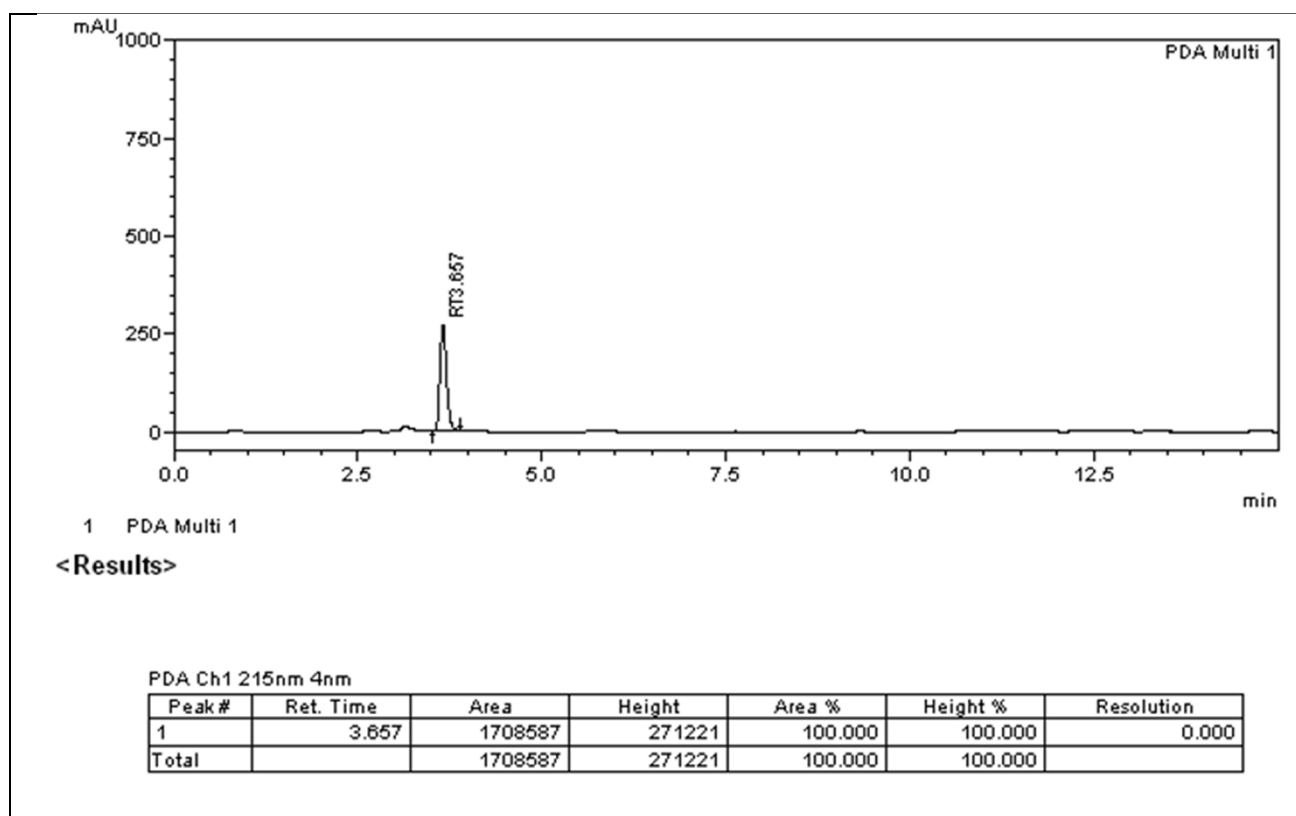

**Figure S1.** Purity chromatogram of the AQQ1.

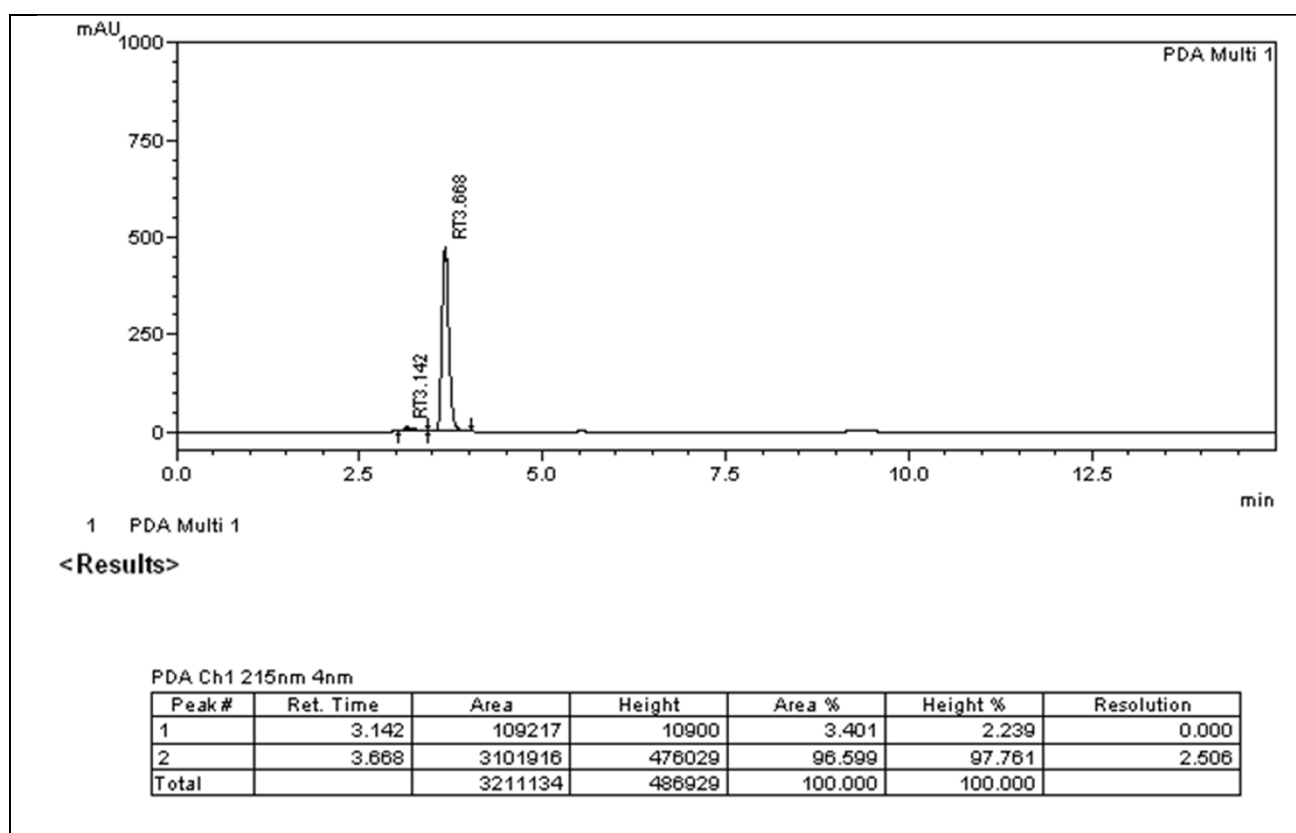

**Figure S2.** Purity chromatogram of the AQQ2.

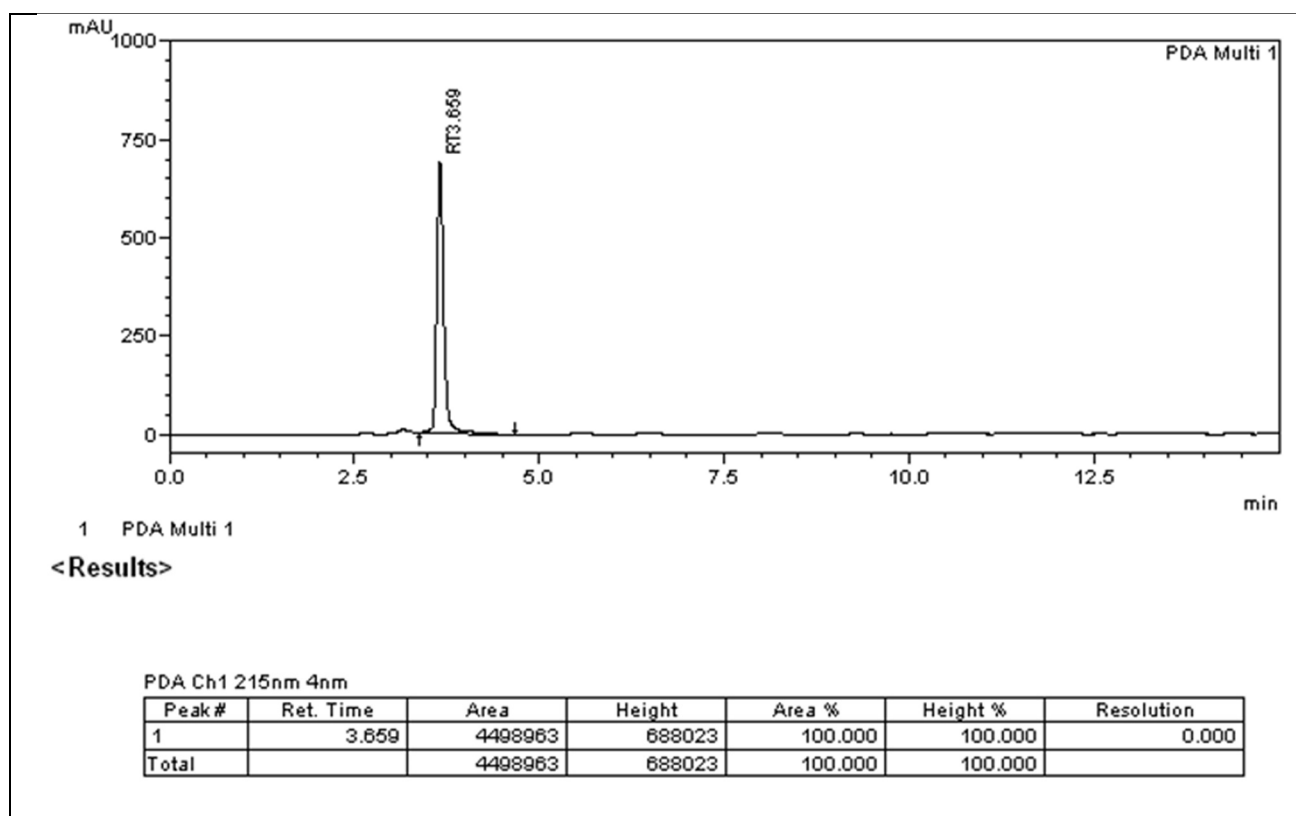

**Figure S3.** Purity chromatogram of the AQQ3.

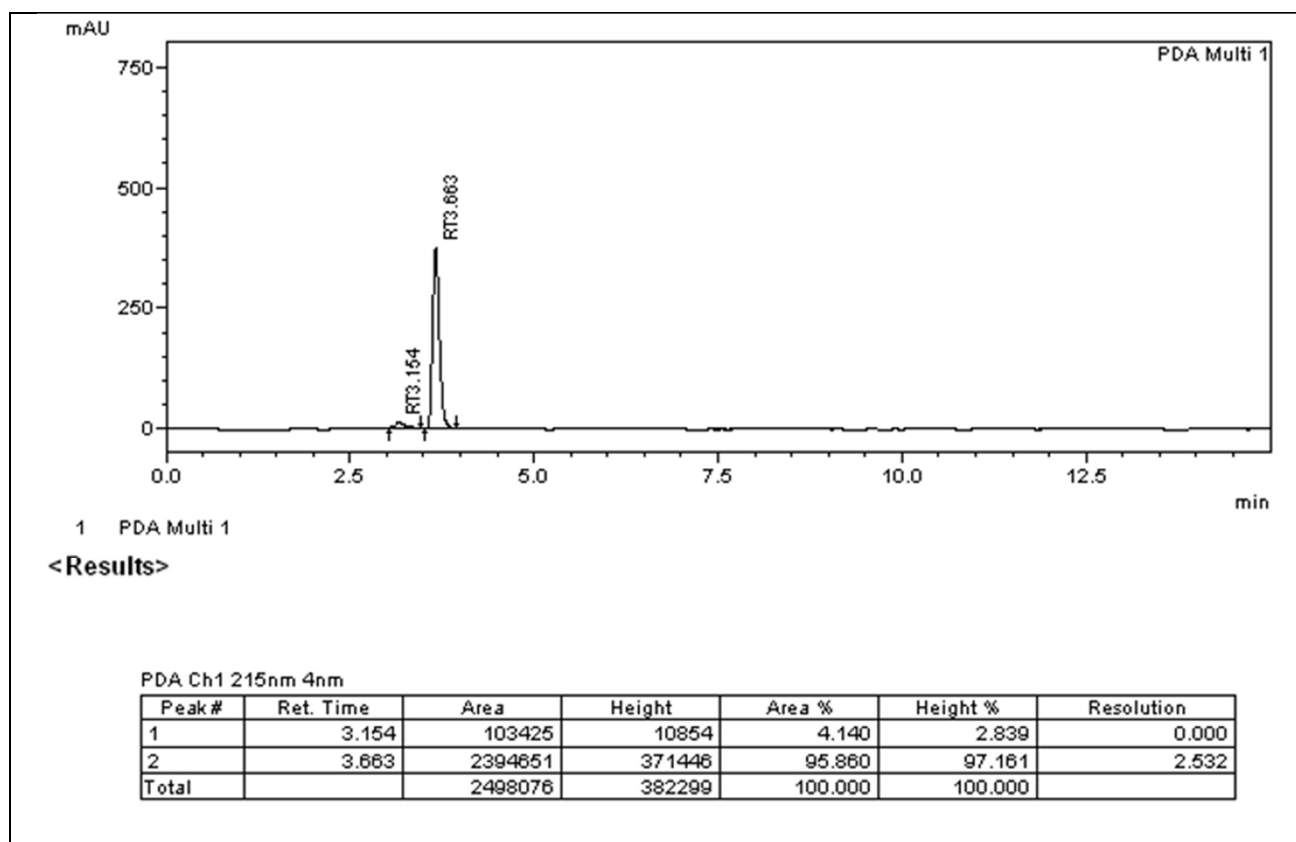

**Figure S4.** Purity chromatogram of the AQQ4.

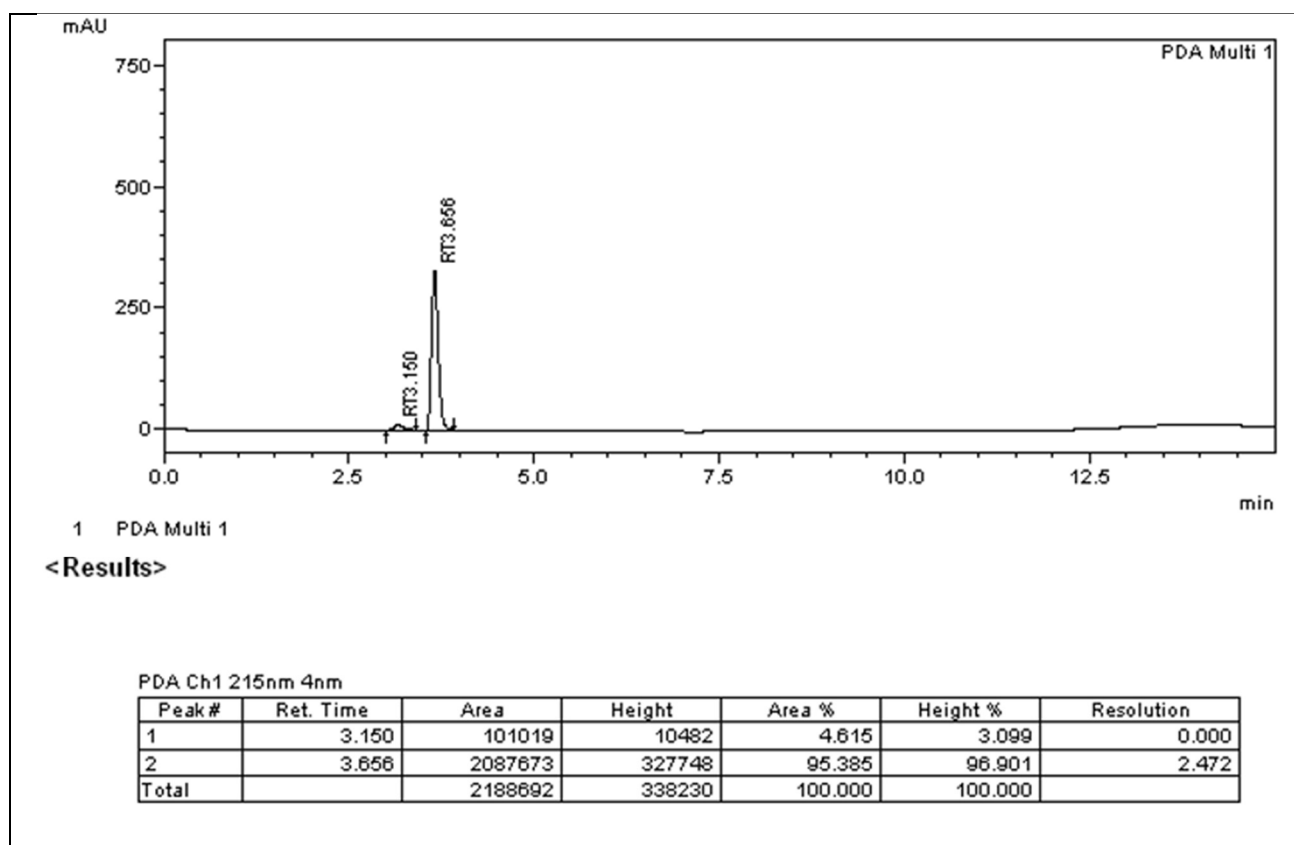

**Figure S5.** Purity chromatogram of the AQQ5.

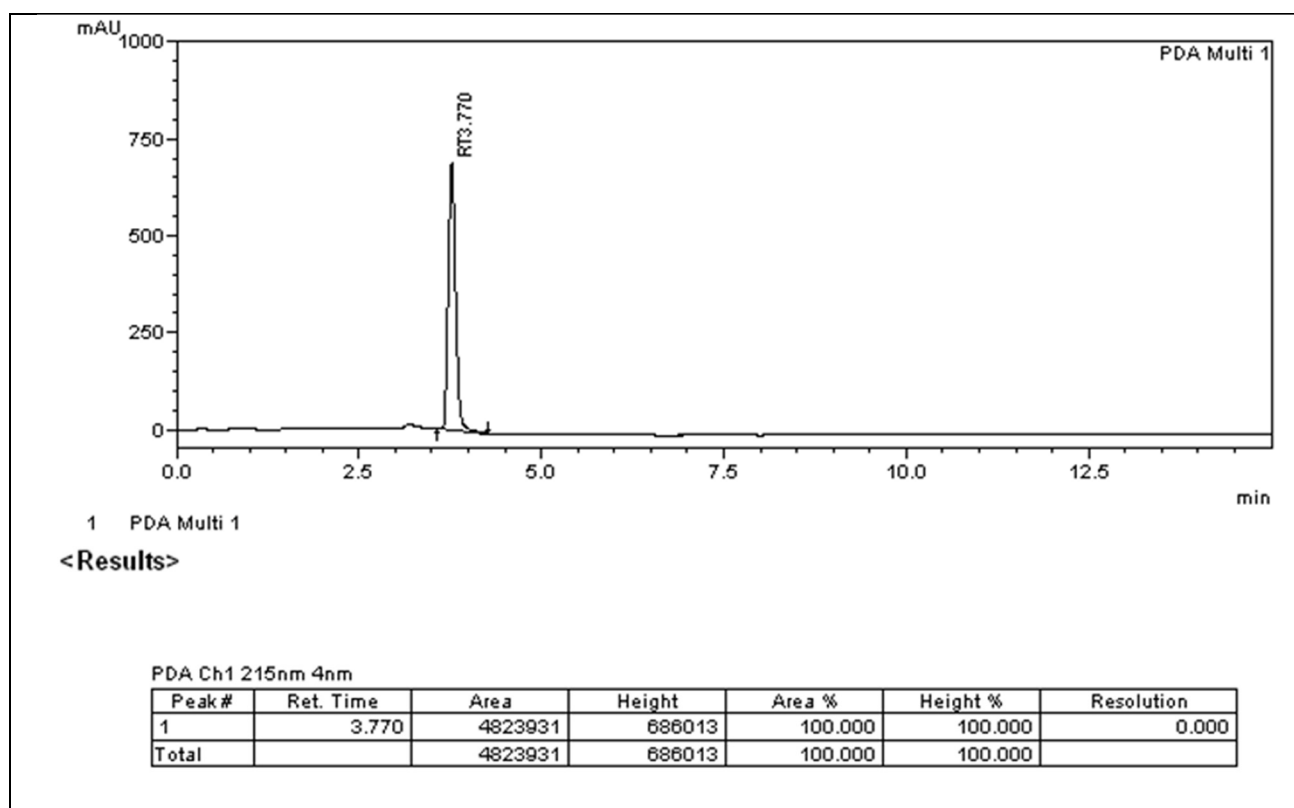

**Figure S6.** Purity chromatogram of the AQQ6.

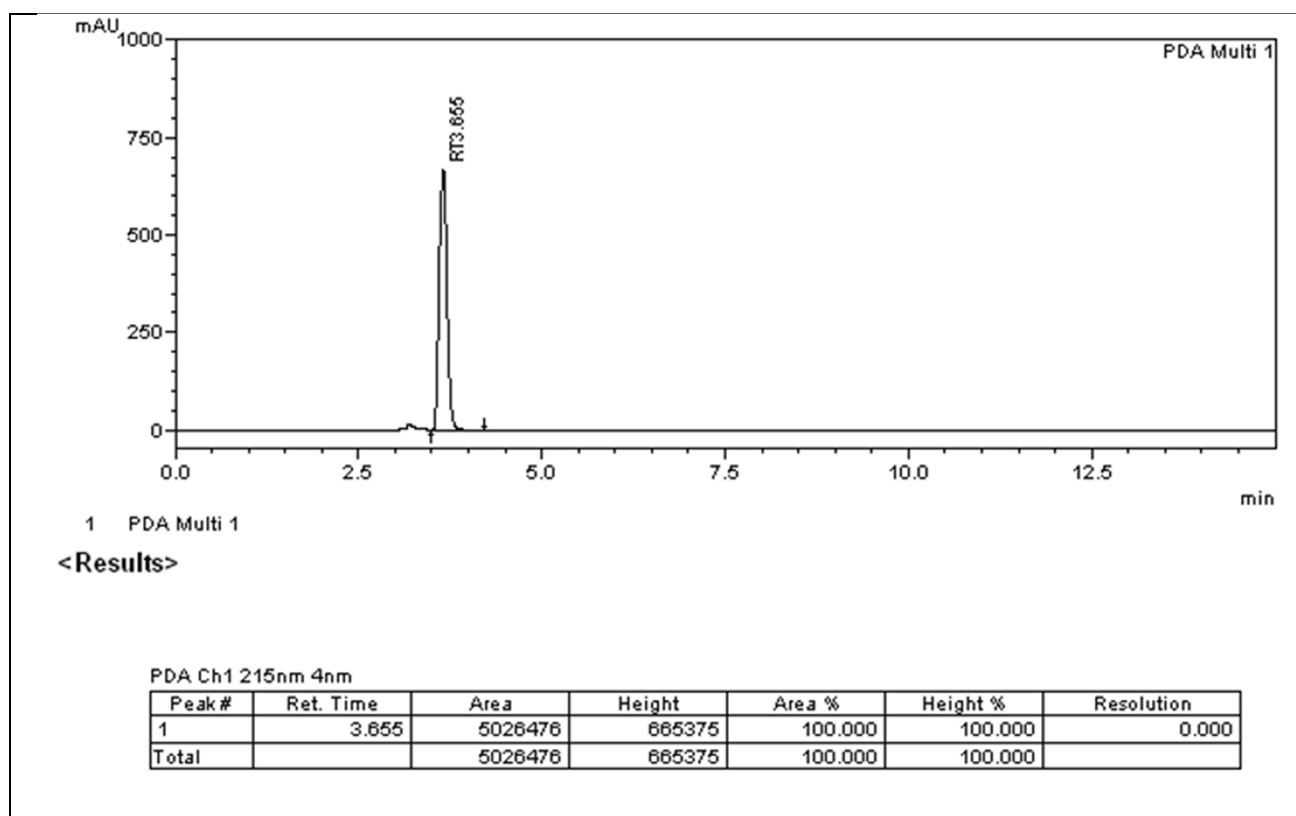

**Figure S7.** Purity chromatogram of the AQQ7.

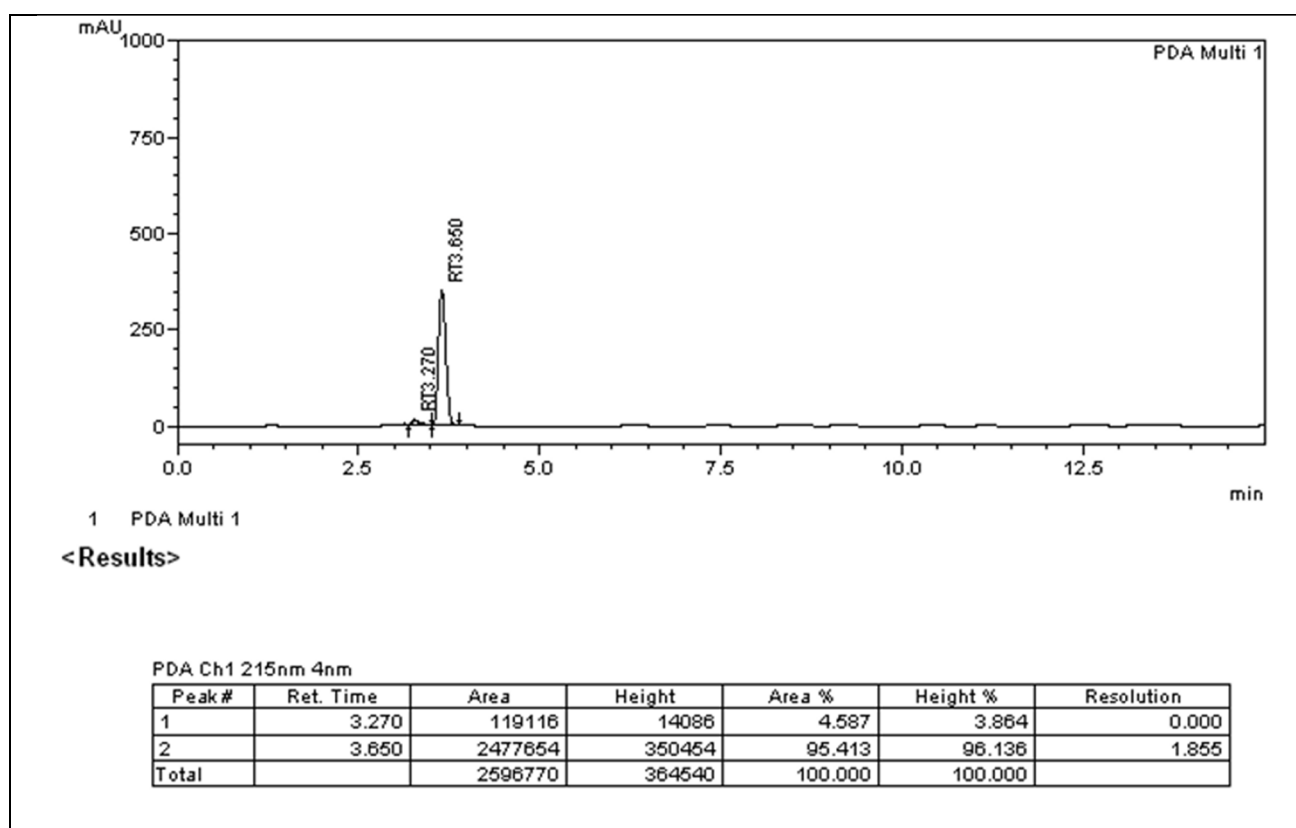

**Figure S8.** Purity chromatogram of the AQQ8.



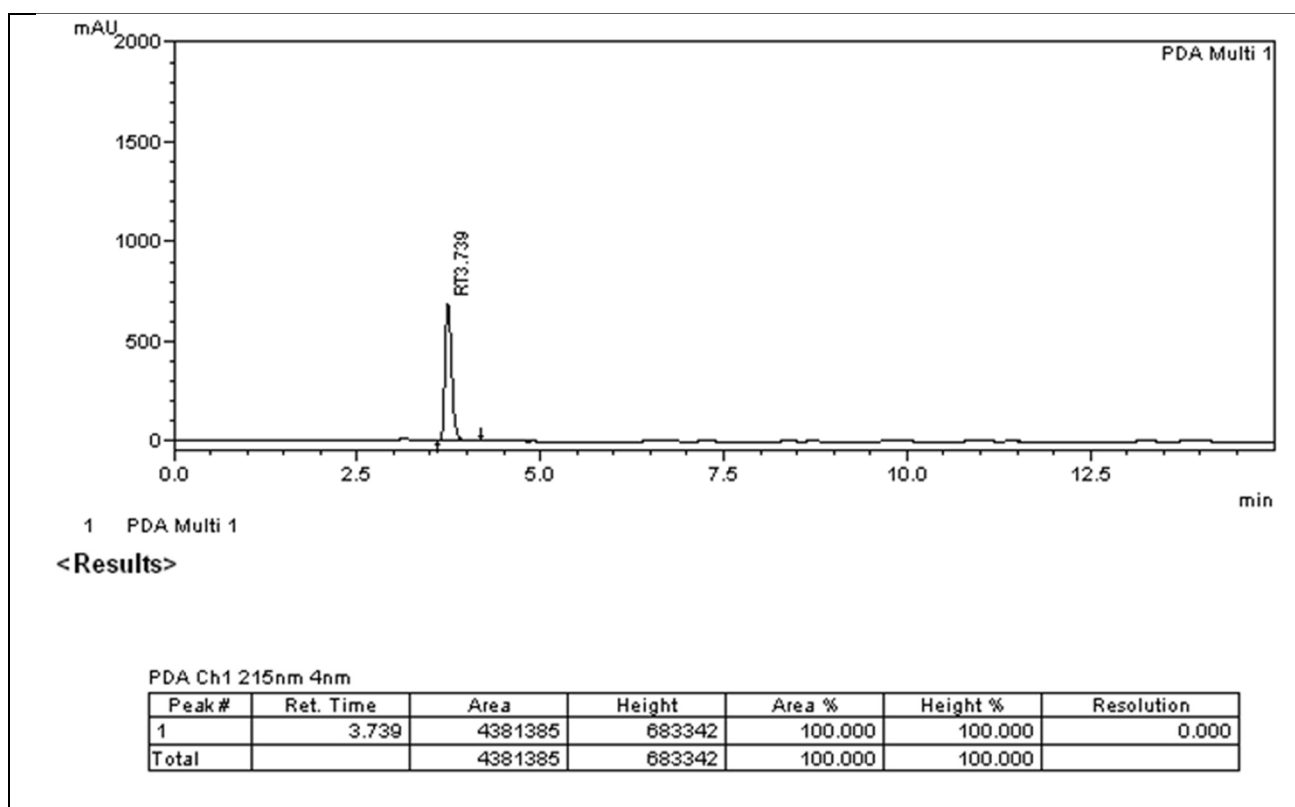

**Figure S9.** Purity chromatogram of the AQQ9.

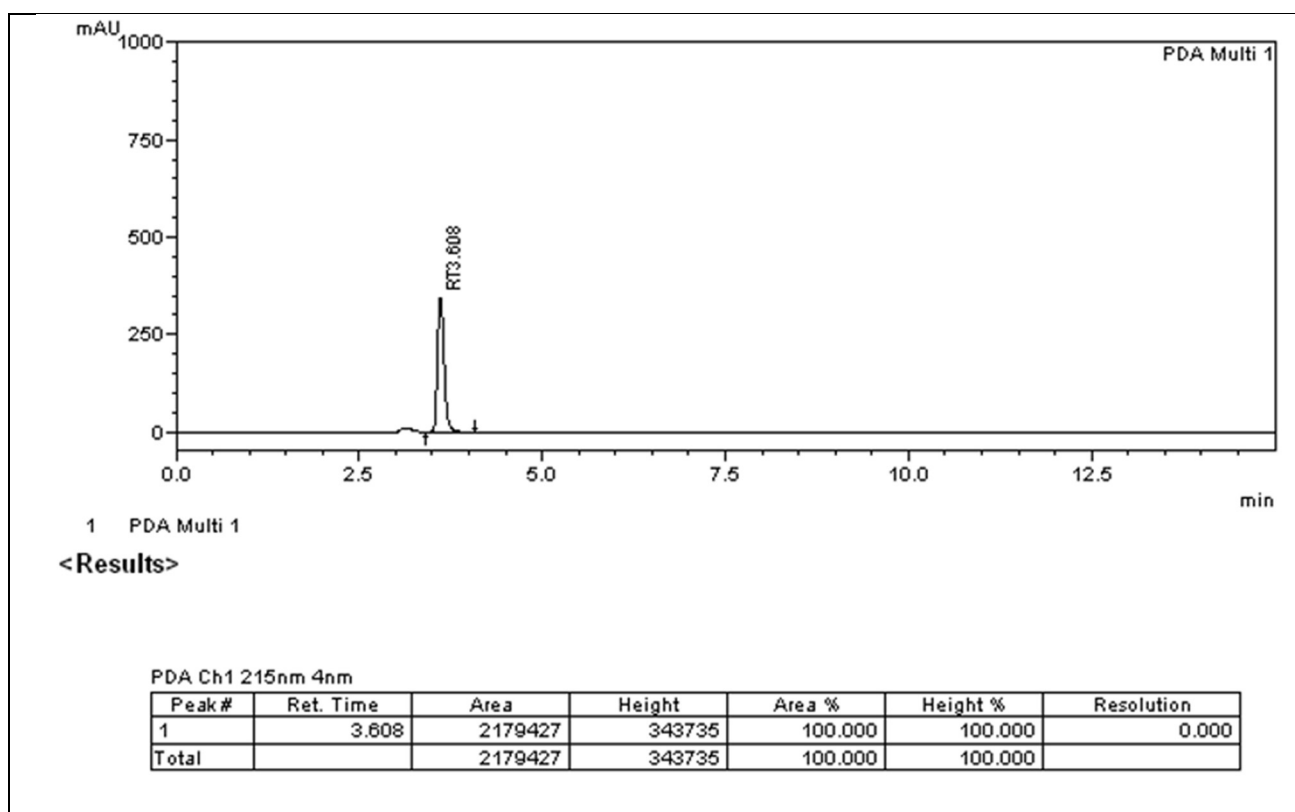

**Figure S10.** Purity chromatogram of the AQQ10.

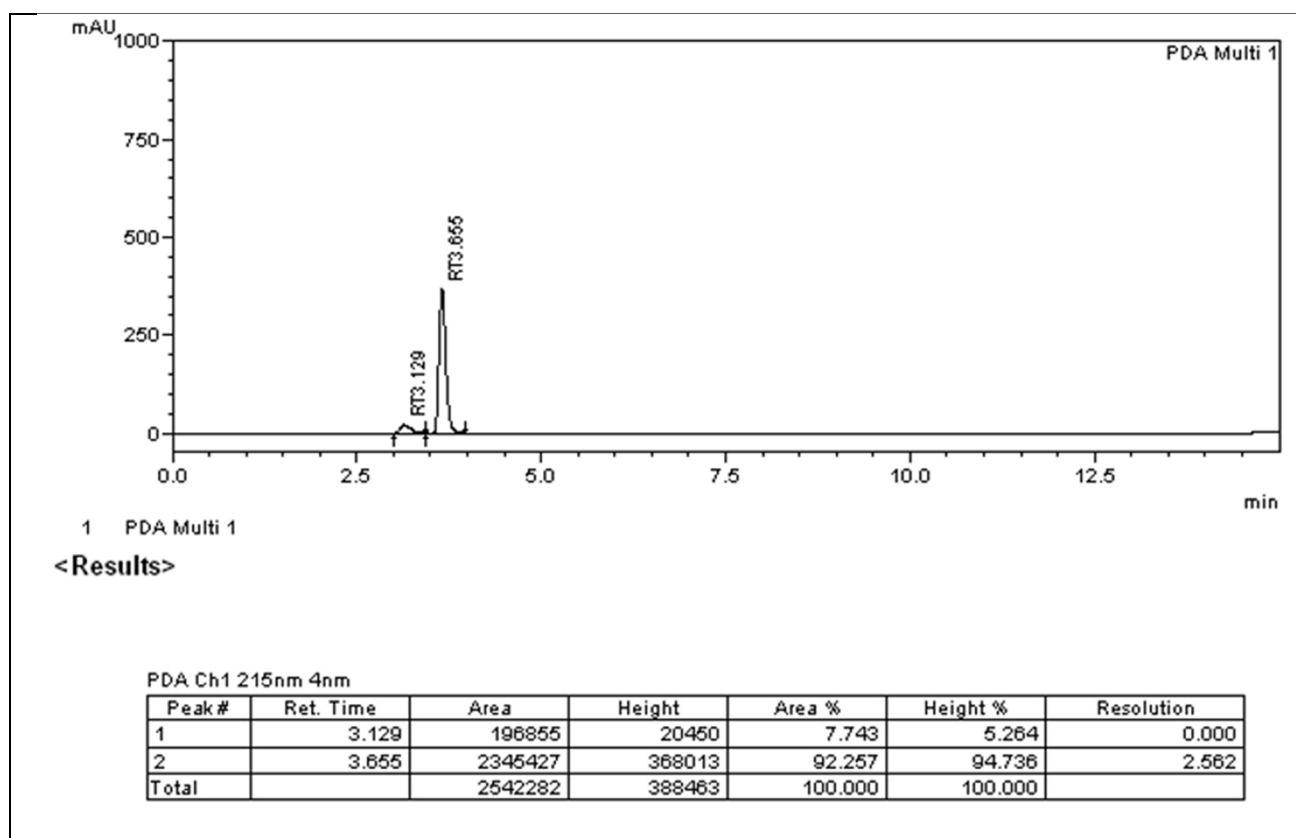

Figure S11. Purity chromatogram of the AQQ11.

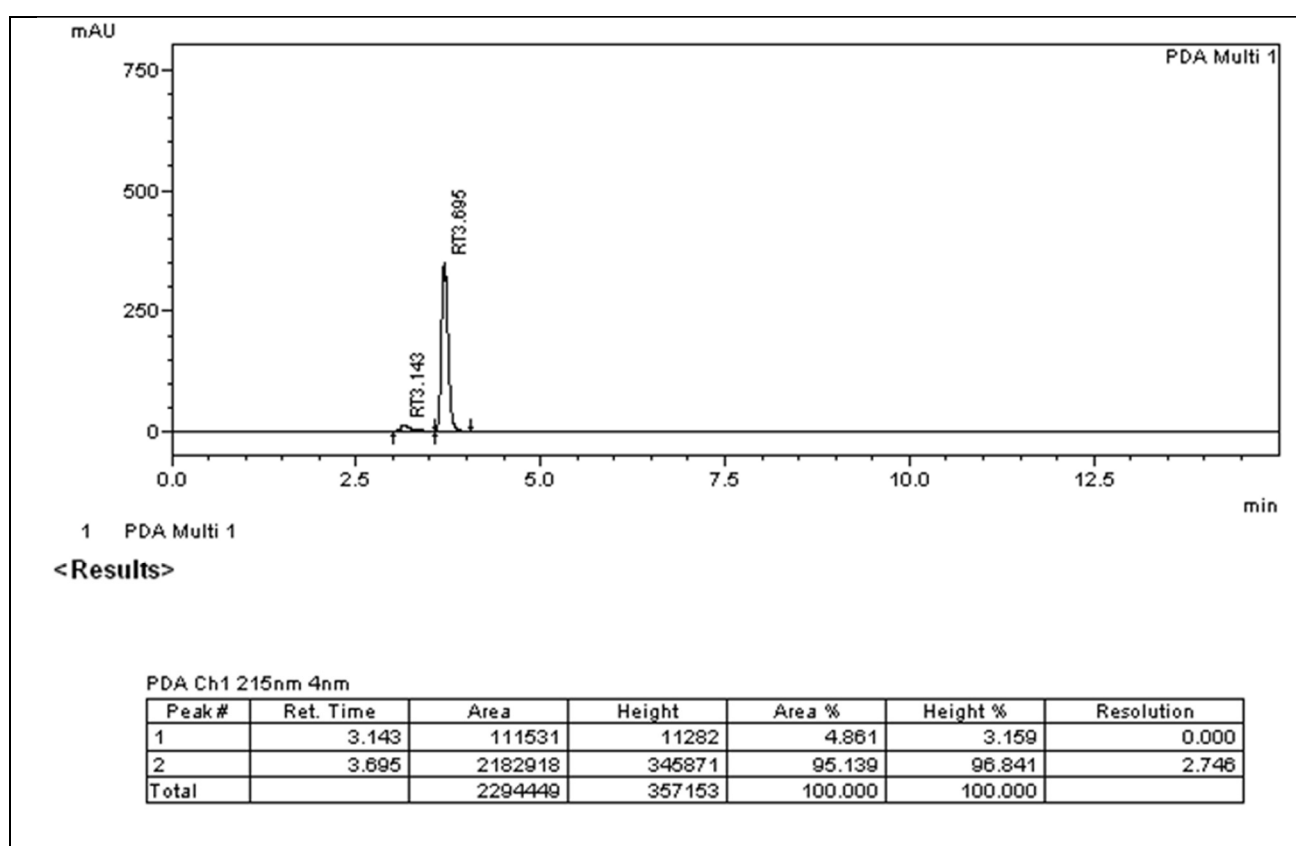

Figure S12. Purity chromatogram of the AQQ12.

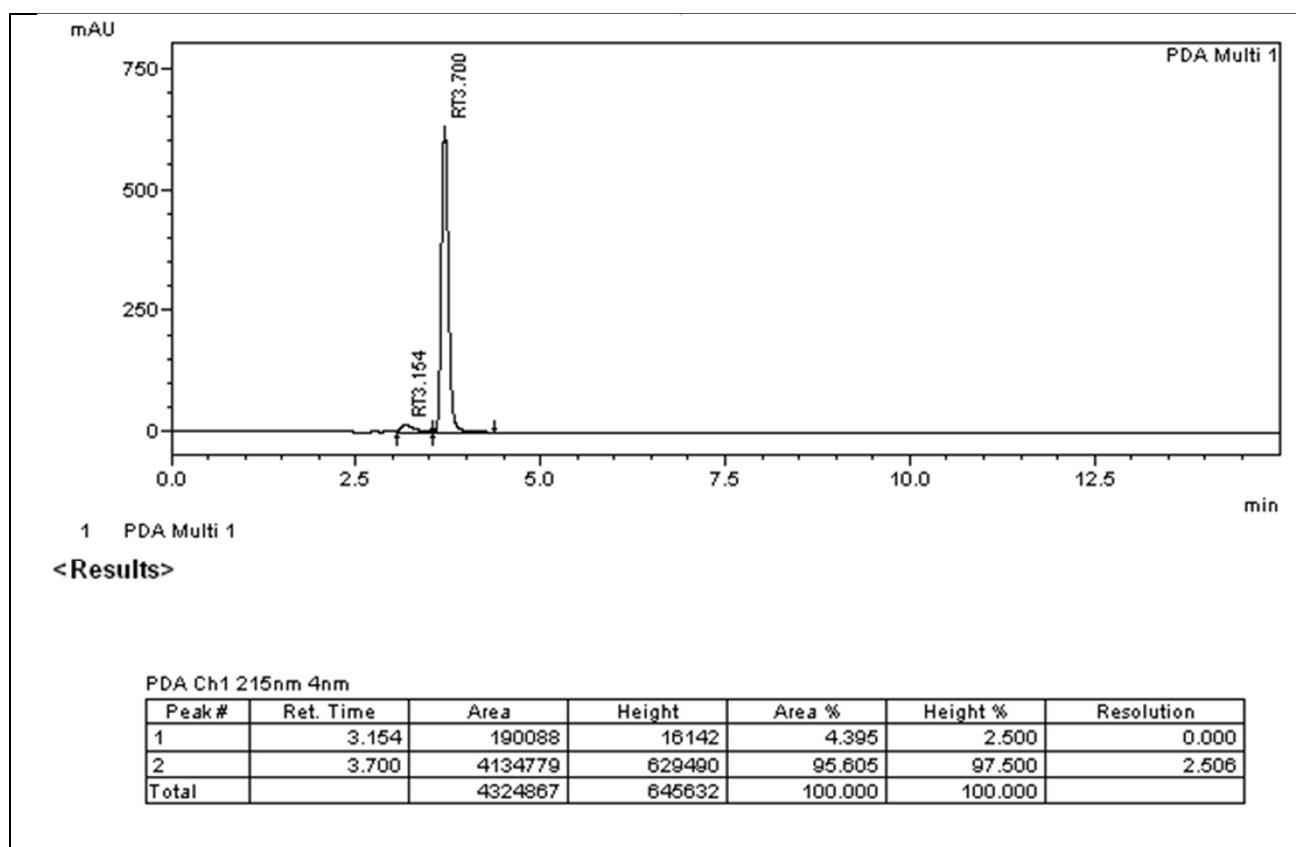

**Figure S13.** Purity chromatogram of the AQQ13.

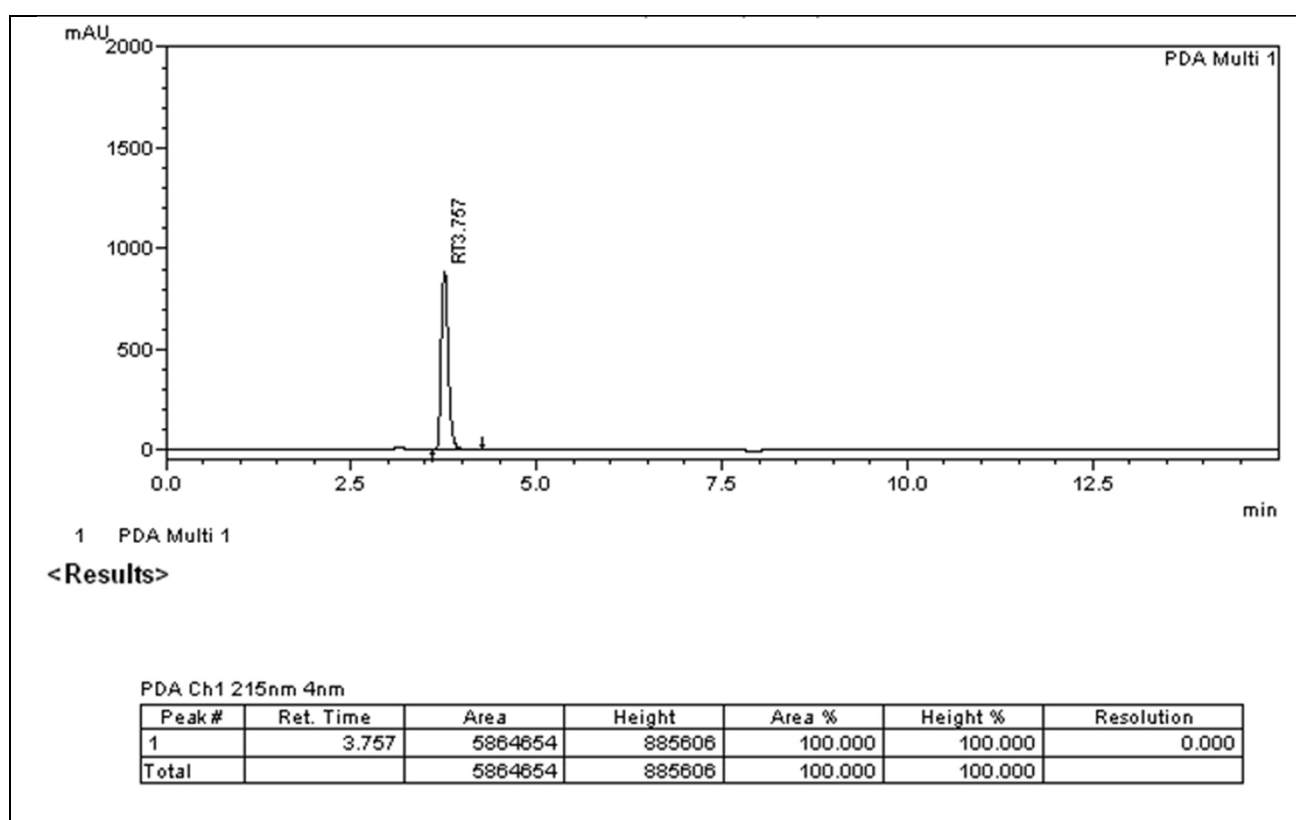

**Figure S14.** Purity chromatogram of the AQQ14.

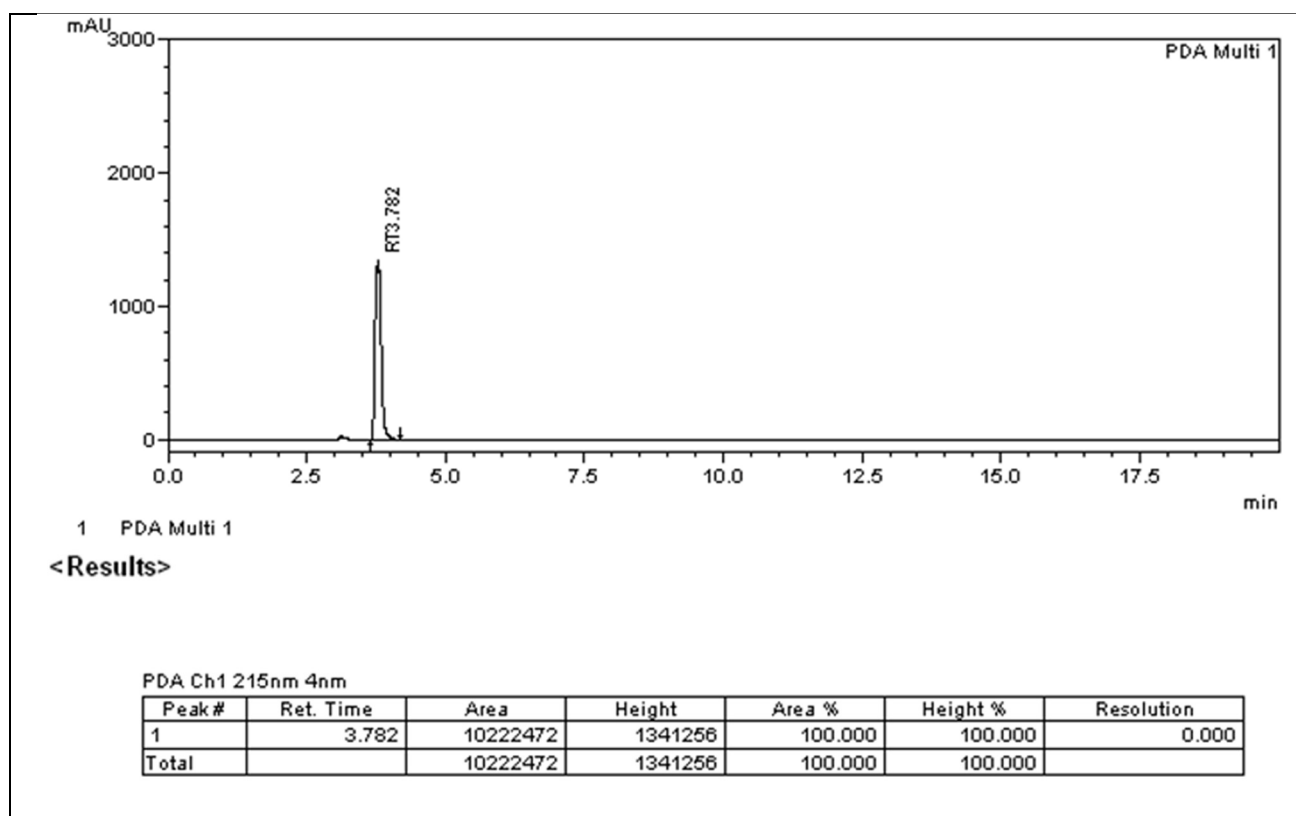

**Figure S15.** Purity chromatogram of the AQQ15.

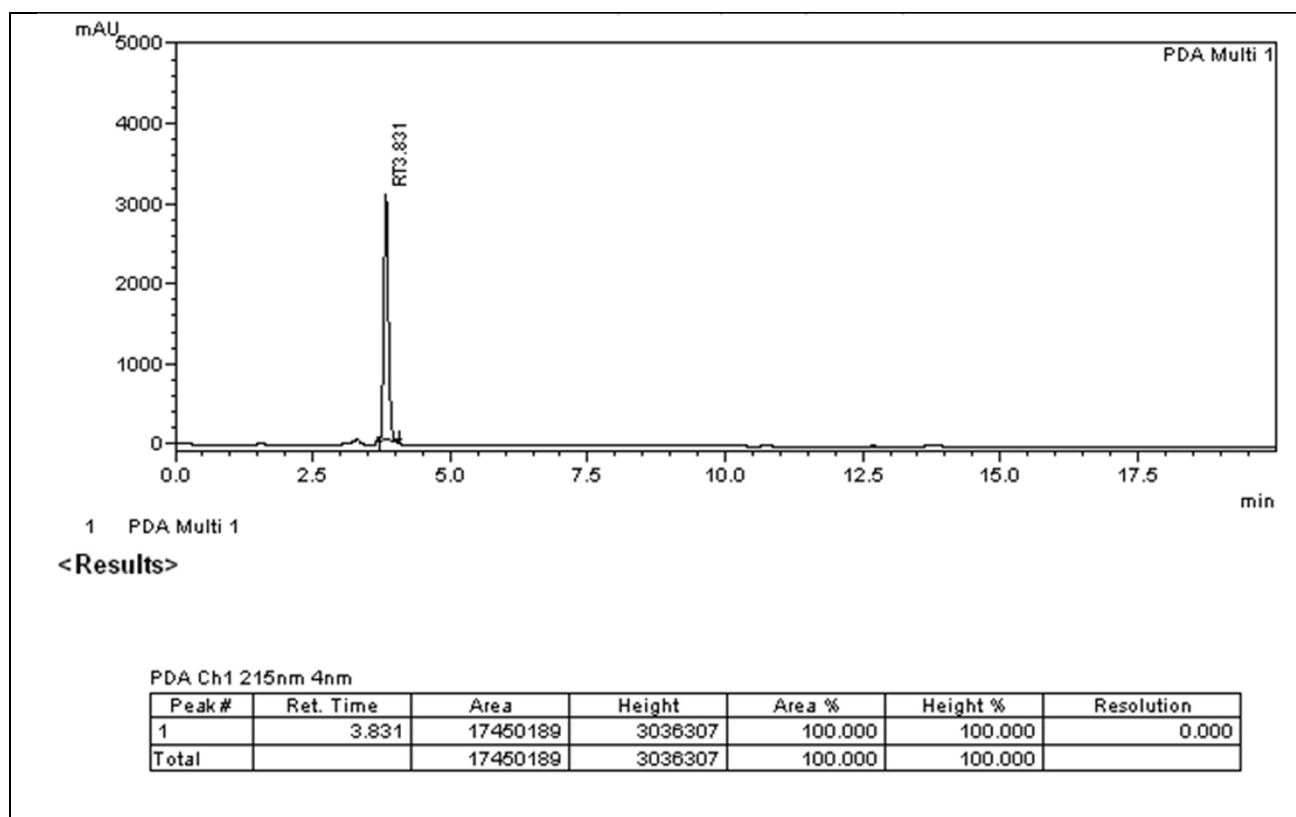

**Figure S16.** Purity chromatogram of the AQQ16.

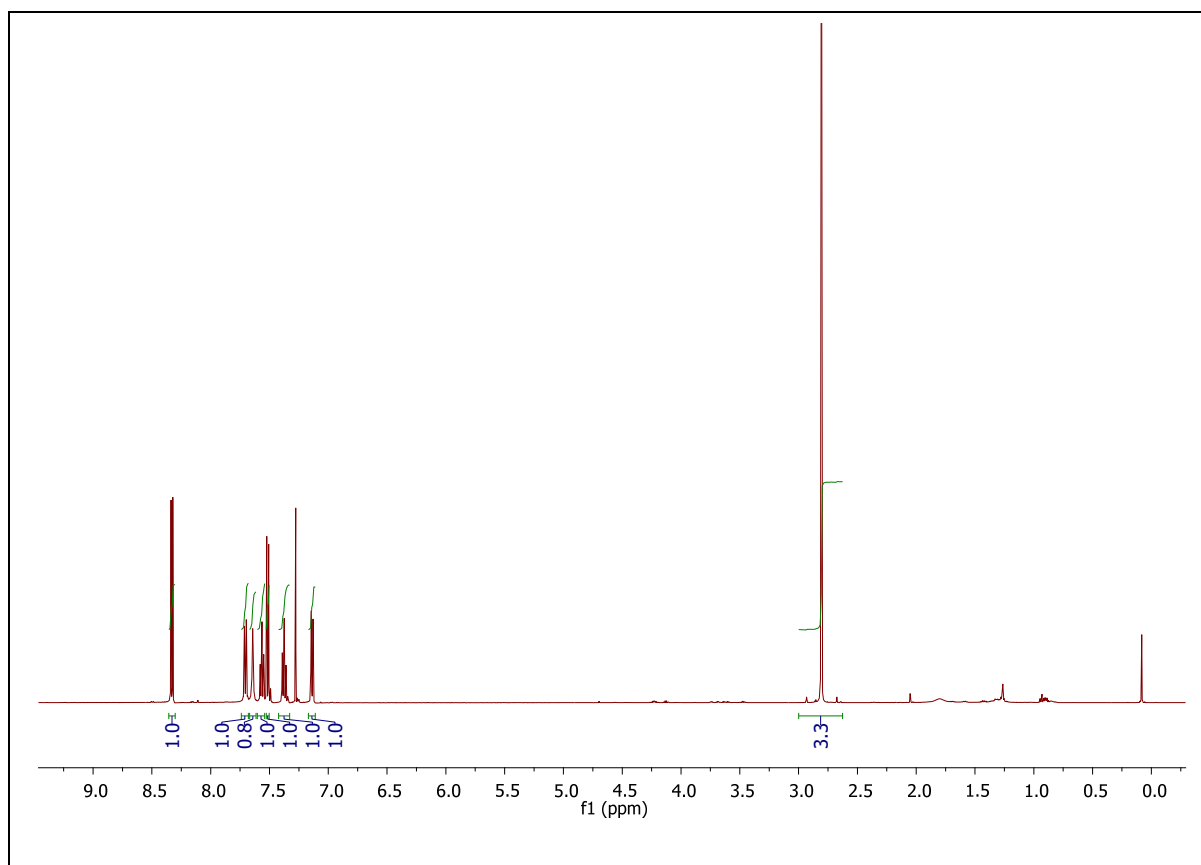

**Figure S17.**  $^1\text{H}$  NMR (500 MHz) spectrum of the AQQ1 in  $\text{CDCl}_3-d_1$ .

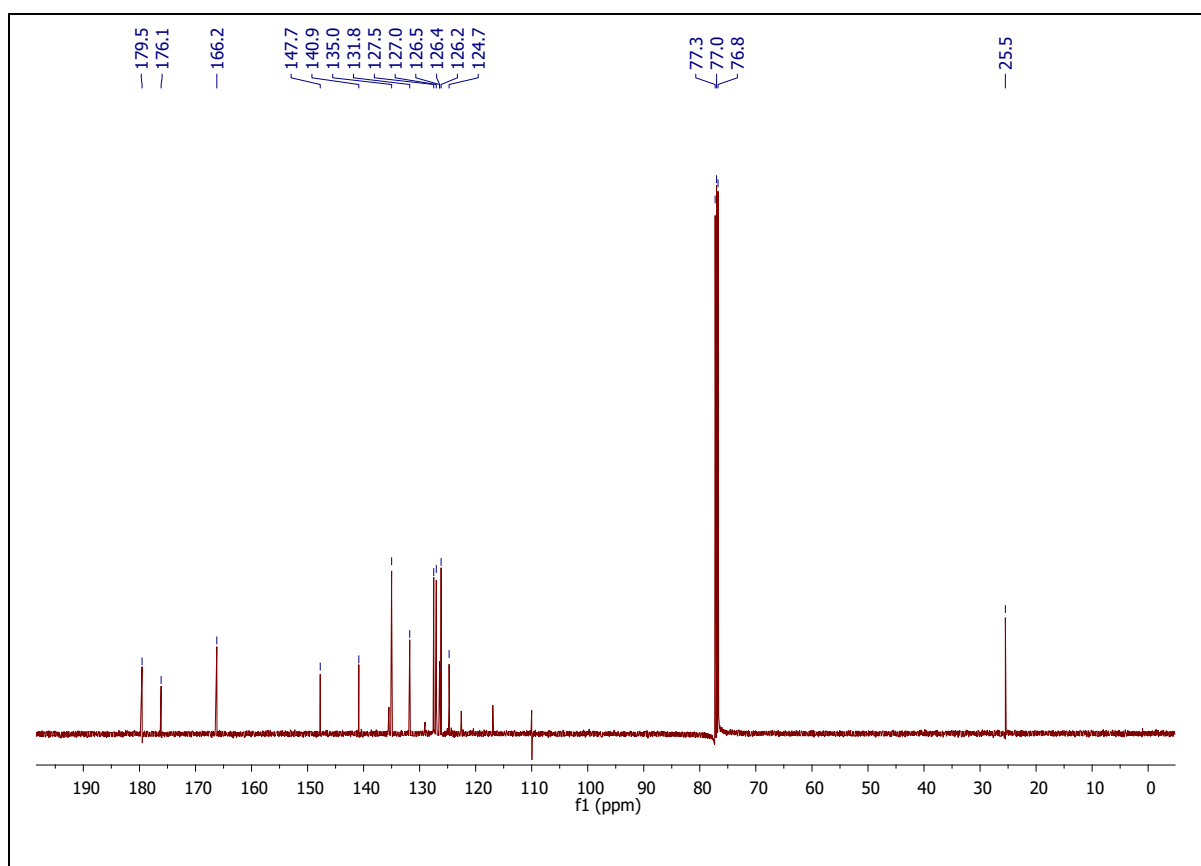

**Figure S18.**  $^{13}\text{C}$  NMR (125 MHz) spectrum of the AQQ1 in  $\text{CDCl}_3-d_1$ .

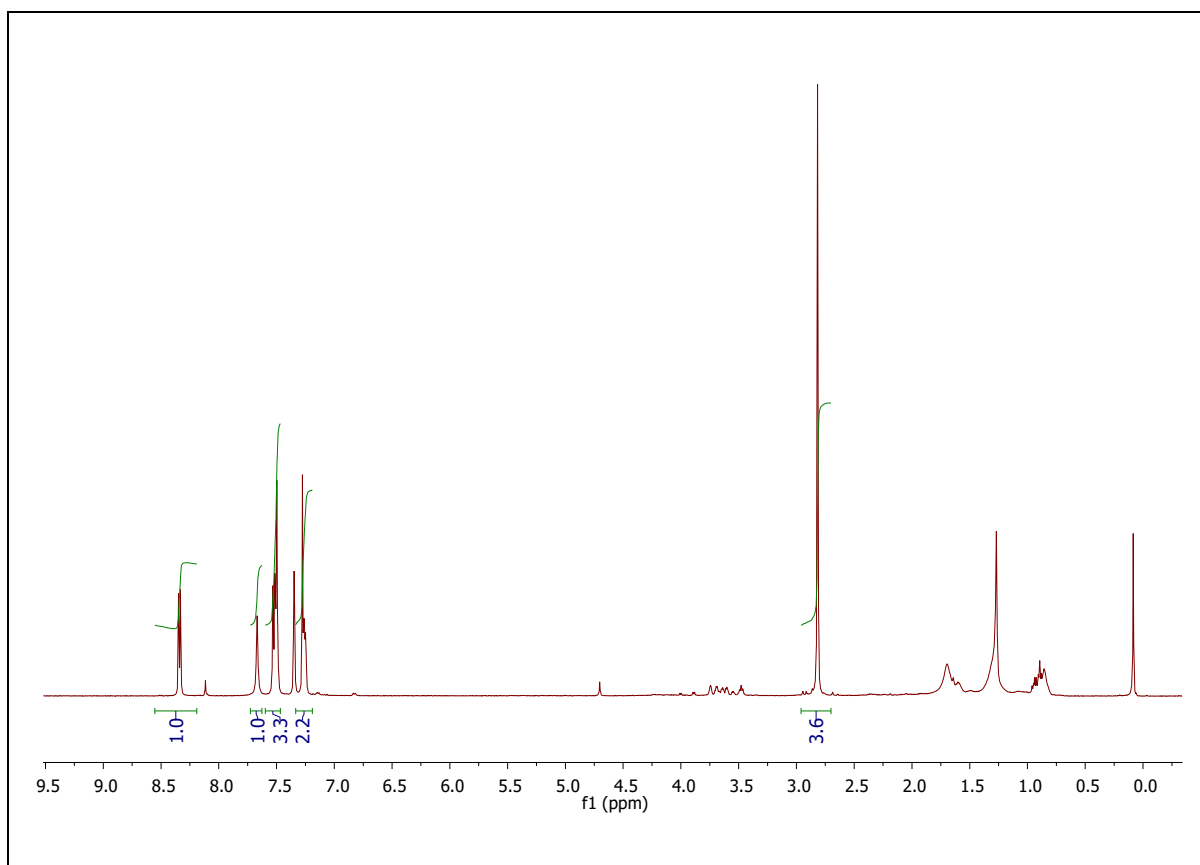

**Figure S19.**  $^1\text{H}$  NMR (500 MHz) spectrum of the **AQQ2** in  $\text{CDCl}_3-d_1$ .

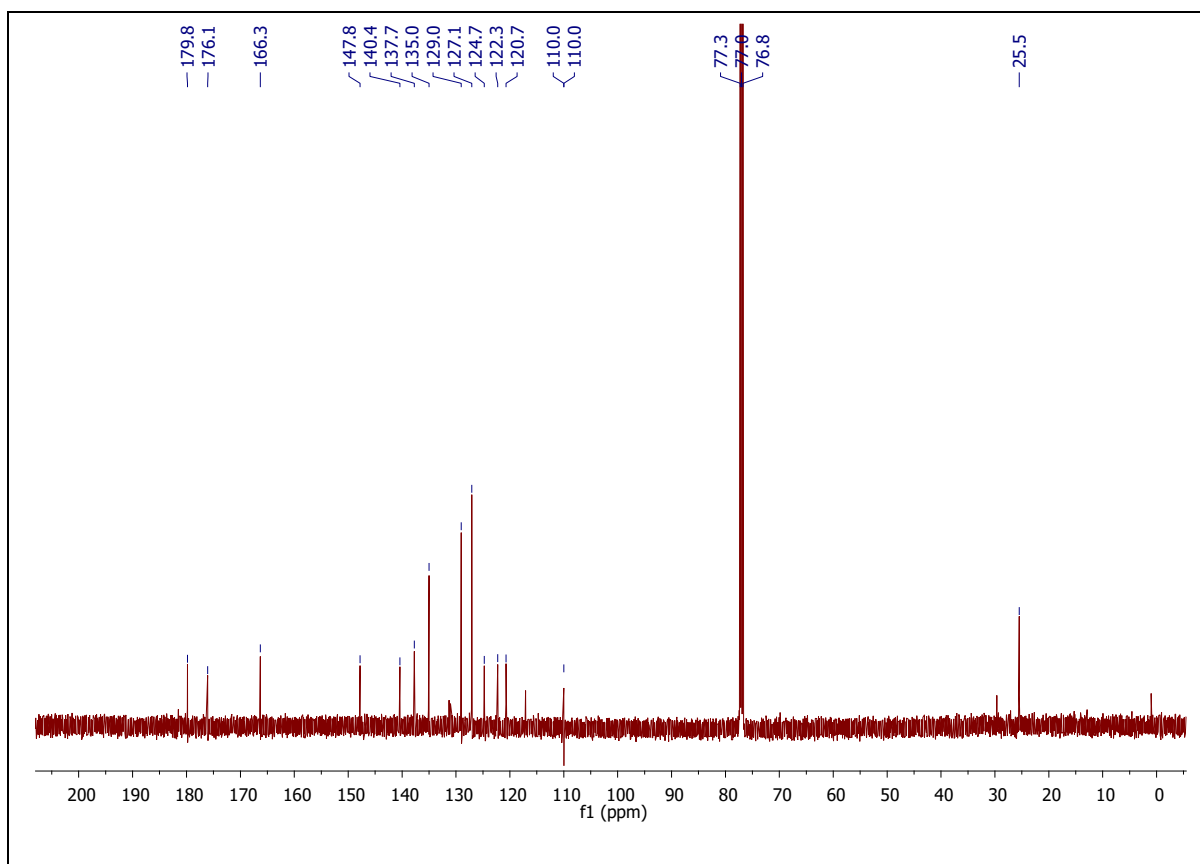

**Figure S20.**  $^{13}\text{C}$  NMR (125 MHz) spectrum of the **AQQ2** in  $\text{CDCl}_3-d_1$ .

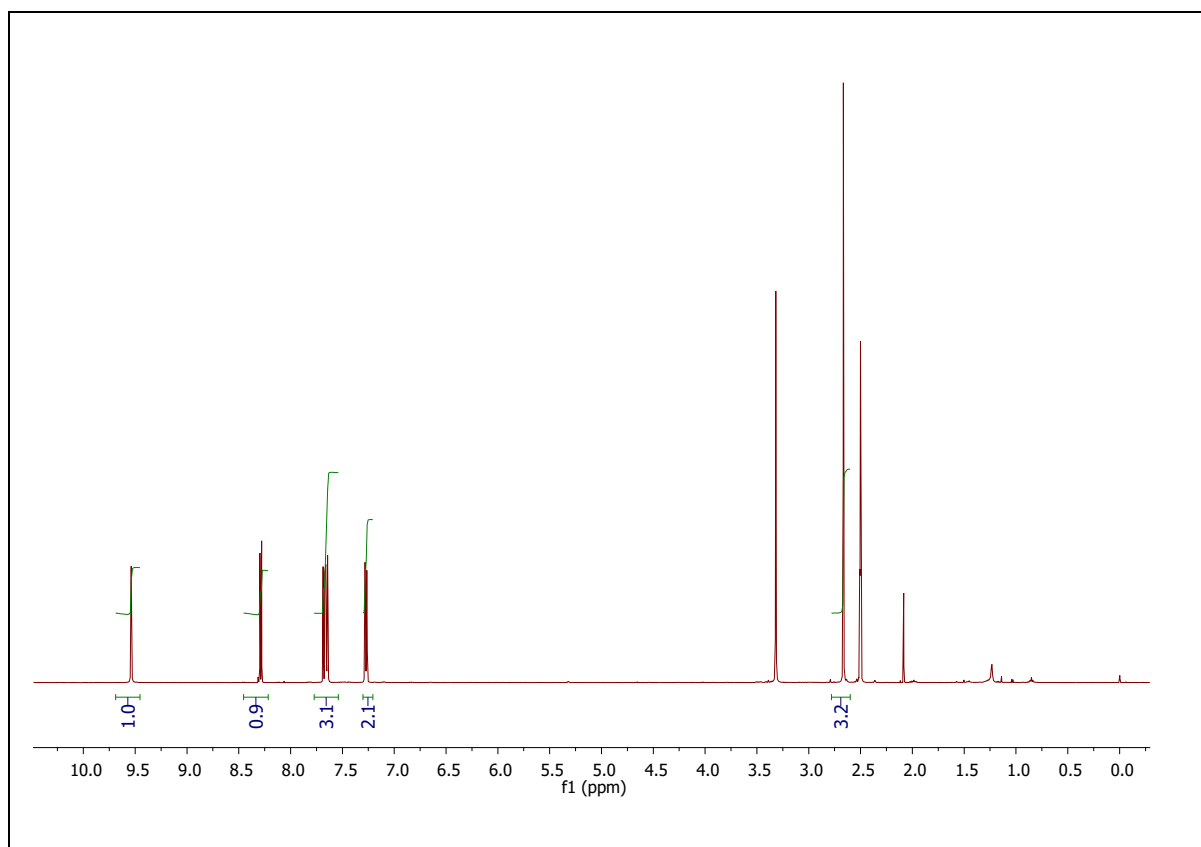

**Figure S21.** <sup>1</sup>H NMR (500 MHz) spectrum of the AQQ3 in DMSO-*d*<sub>6</sub>.

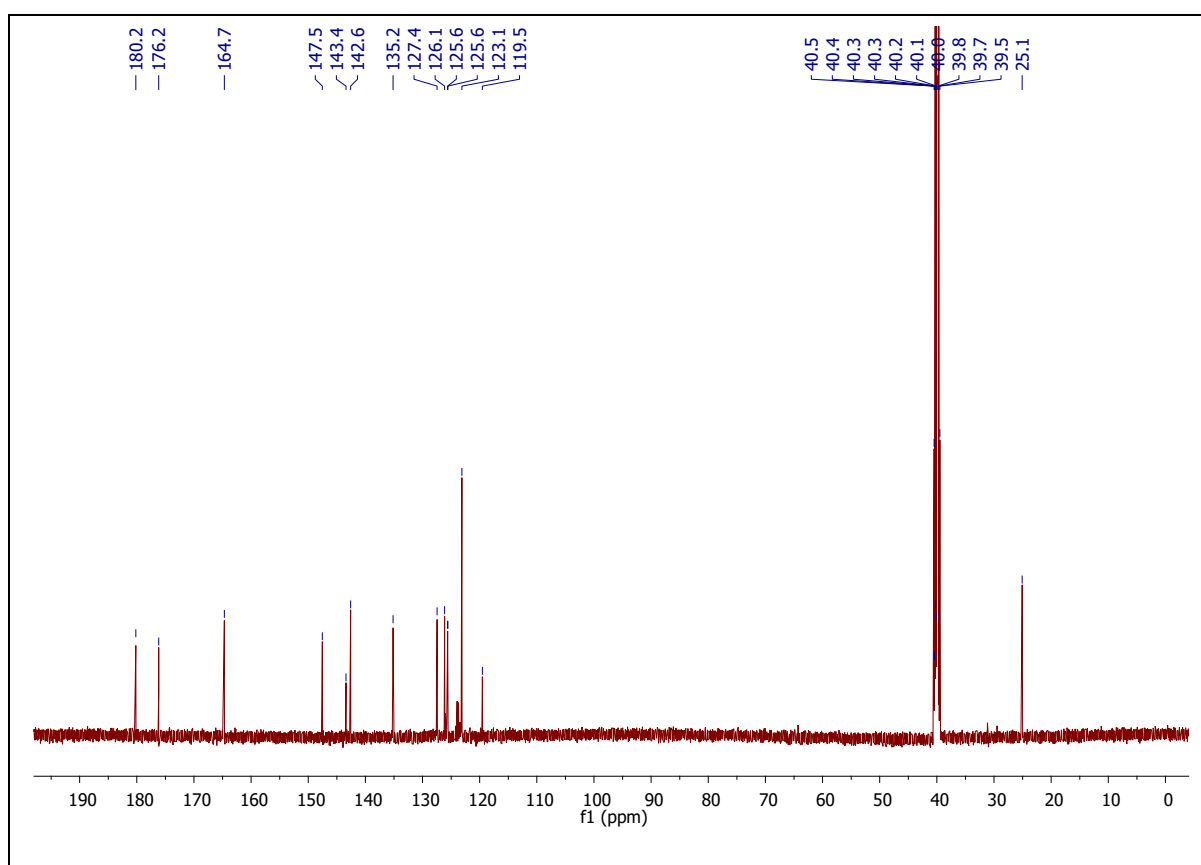

**Figure S22.** <sup>13</sup>C NMR (125 MHz) spectrum of the AQQ3 in DMSO-*d*<sub>6</sub>.

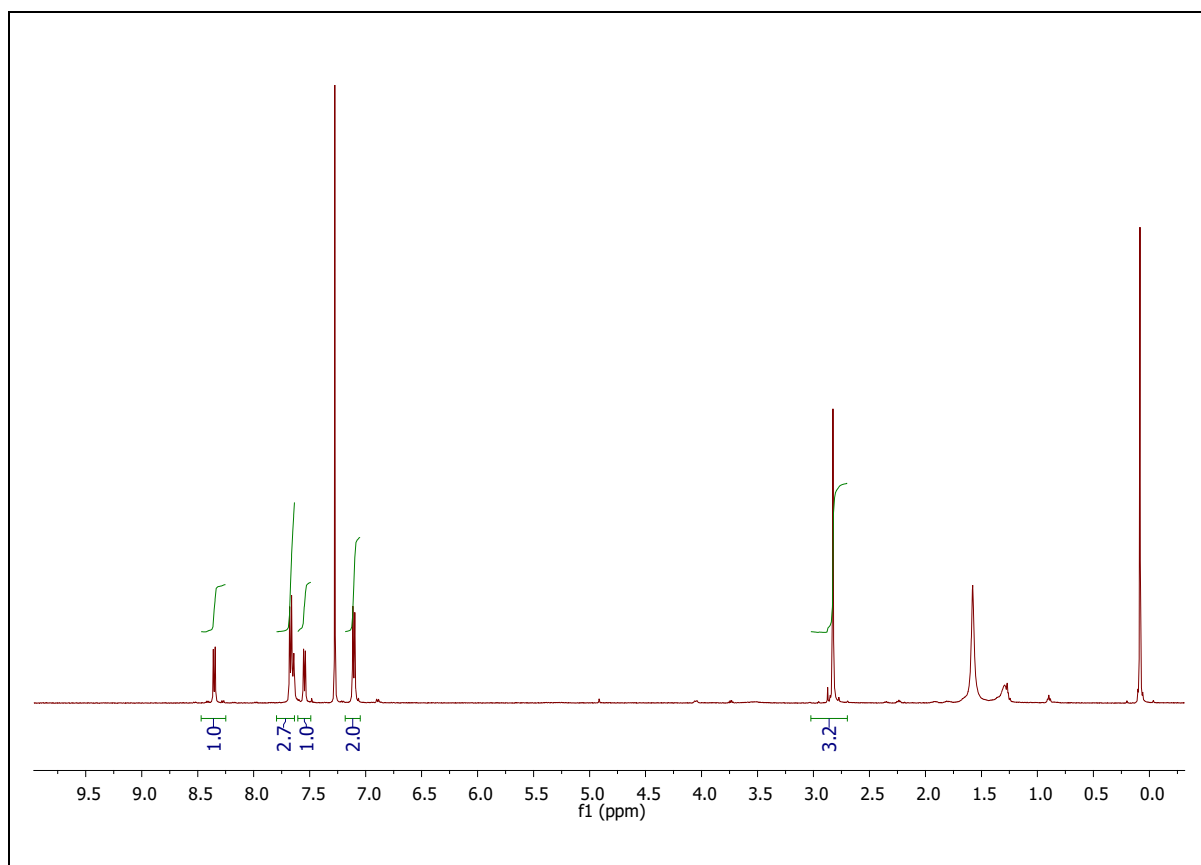

**Figure S23.** <sup>1</sup>H NMR (500 MHz) spectrum of the AQQ4 in CDCl<sub>3</sub>-d<sub>1</sub>.

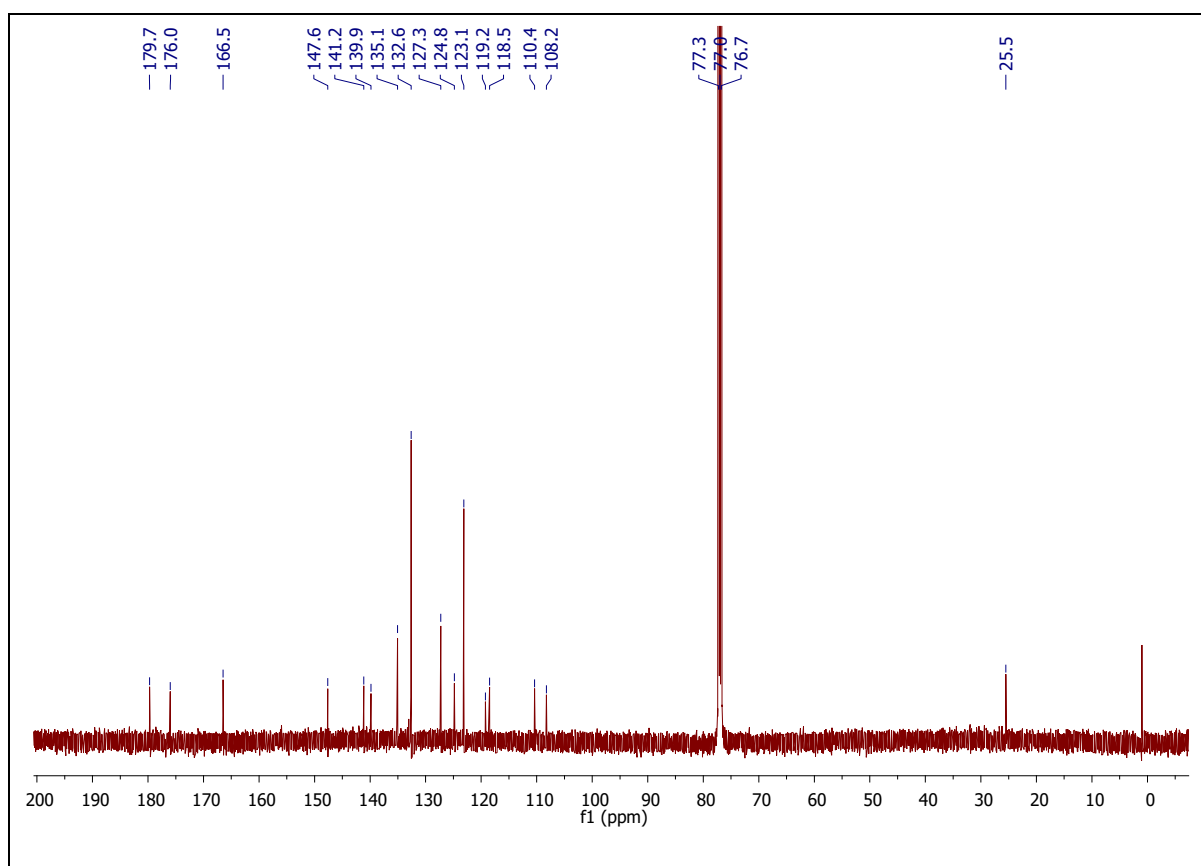

**Figure S24.** <sup>13</sup>C NMR (125 MHz) spectrum of the AQQ4 in CDCl<sub>3</sub>-d<sub>1</sub>.



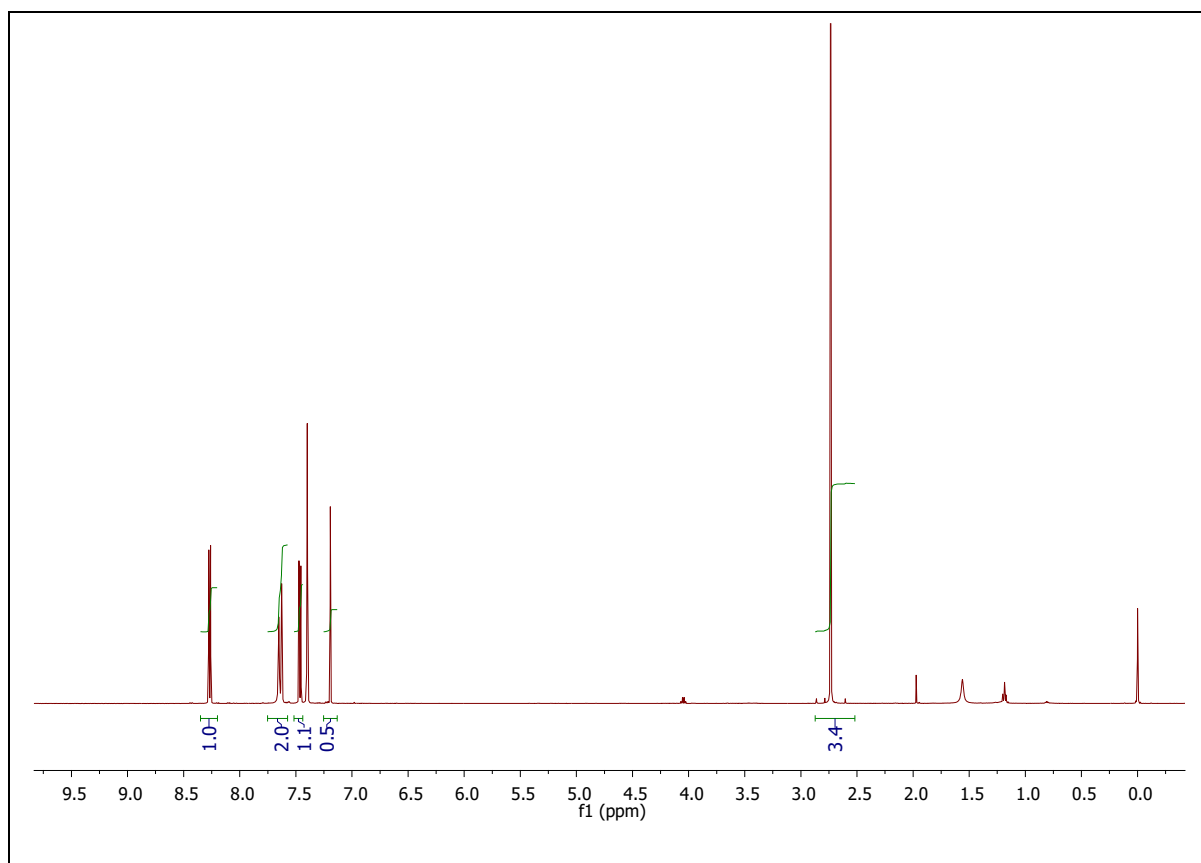

**Figure S25.** <sup>1</sup>H NMR (500 MHz) spectrum of the AQQ5 in CDCl<sub>3</sub>-d<sub>1</sub>.

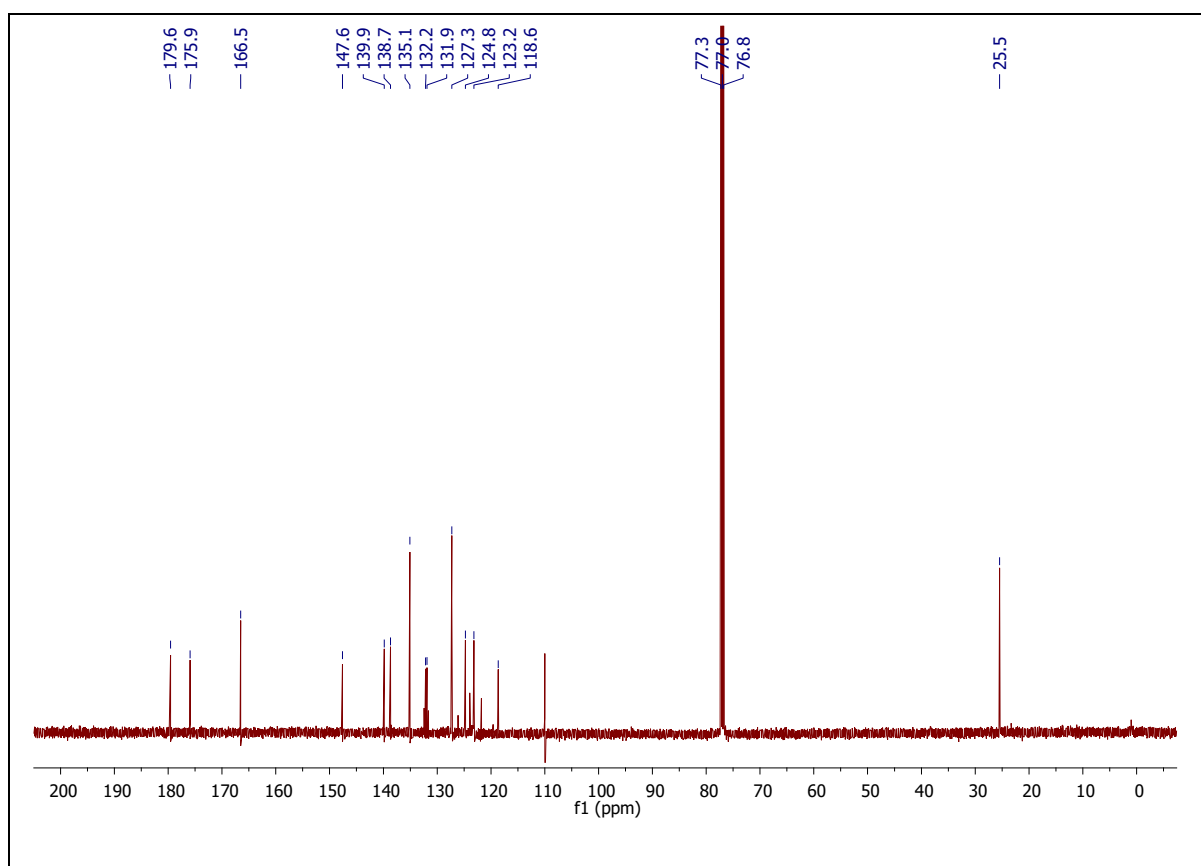

**Figure S26.** <sup>13</sup>C NMR (125 MHz) spectrum of the AQQ5 in CDCl<sub>3</sub>-d<sub>1</sub>.

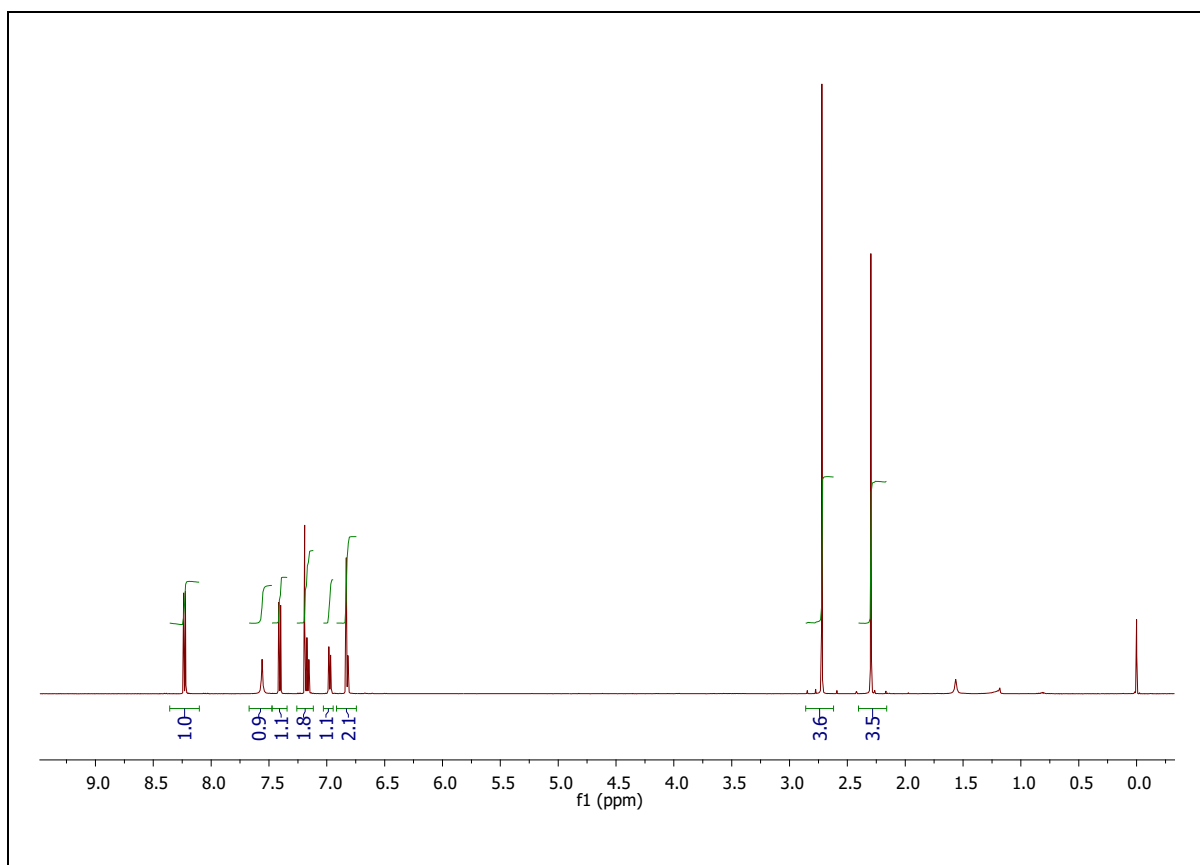

**Figure S27.** <sup>1</sup>H NMR (500 MHz) spectrum of the AQQ6 in CDCl<sub>3</sub>-d<sub>1</sub>.

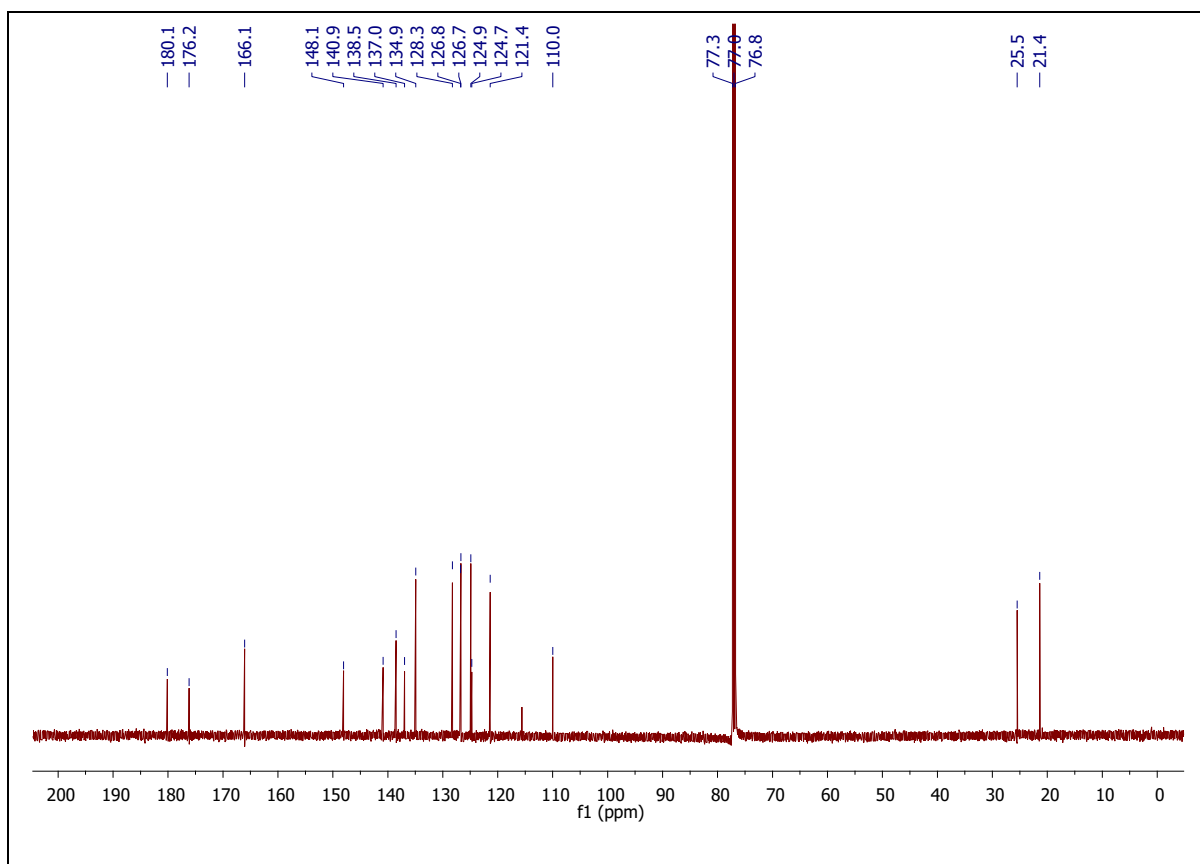

**Figure S28.** <sup>13</sup>C NMR (125 MHz) spectrum of the AQQ6 in CDCl<sub>3</sub>-d<sub>1</sub>.

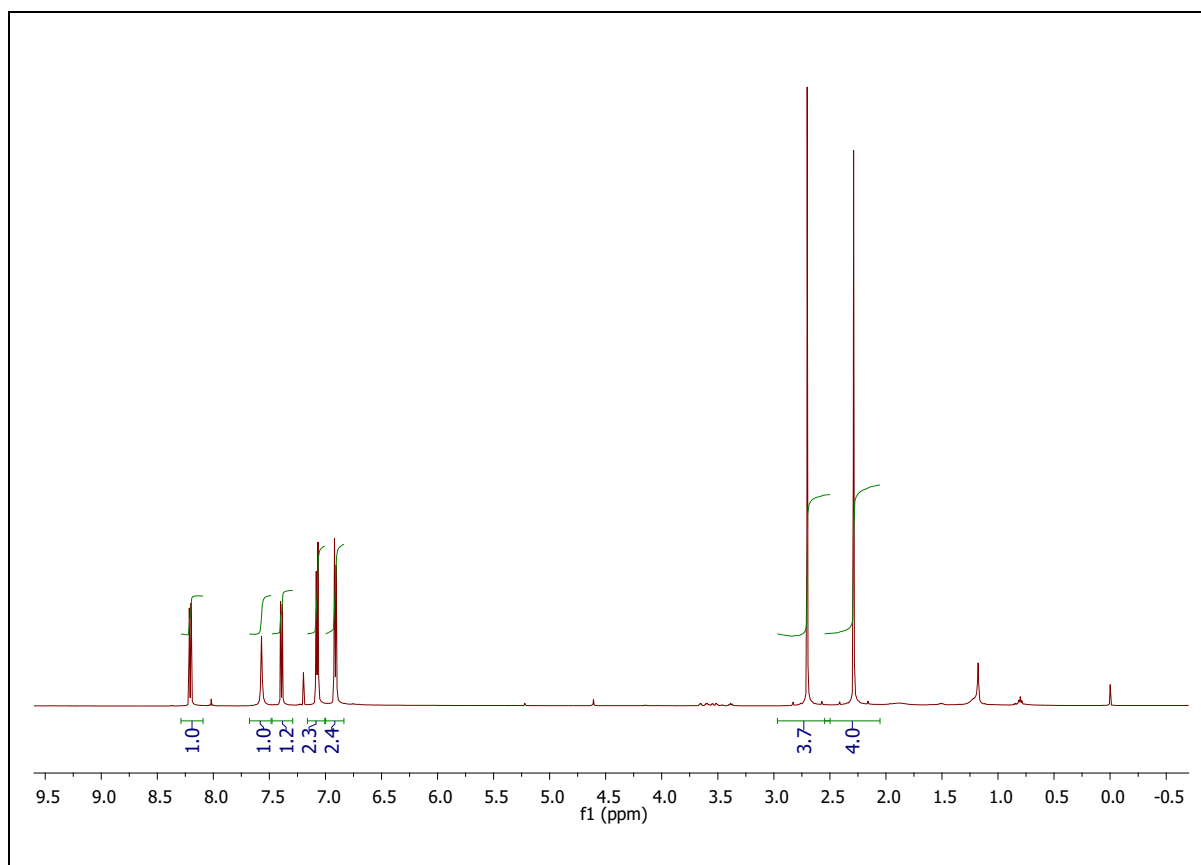

**Figure S29.** <sup>1</sup>H NMR (500 MHz) spectrum of the AQQ7 in CDCl<sub>3</sub>-d<sub>1</sub>.

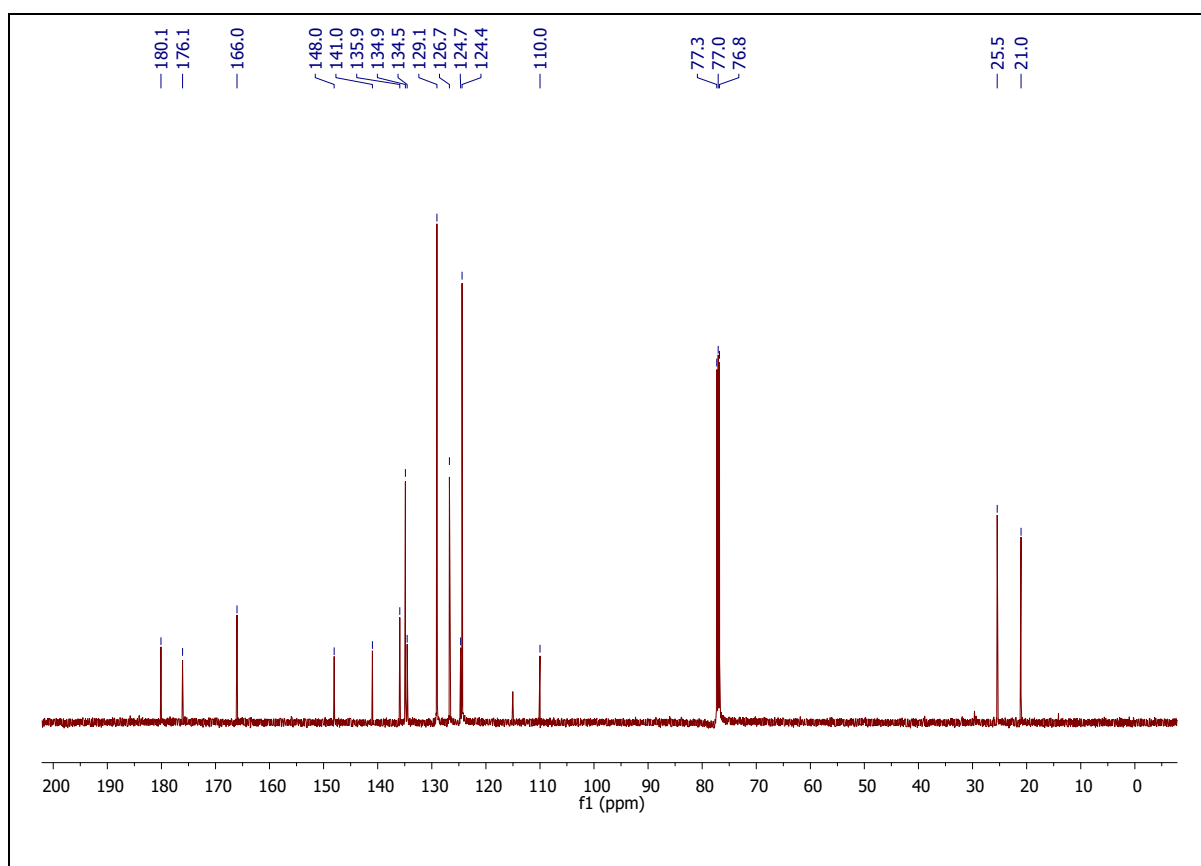

**Figure S30.** <sup>13</sup>C NMR (125 MHz) spectrum of the AQQ7 in CDCl<sub>3</sub>-d<sub>1</sub>.

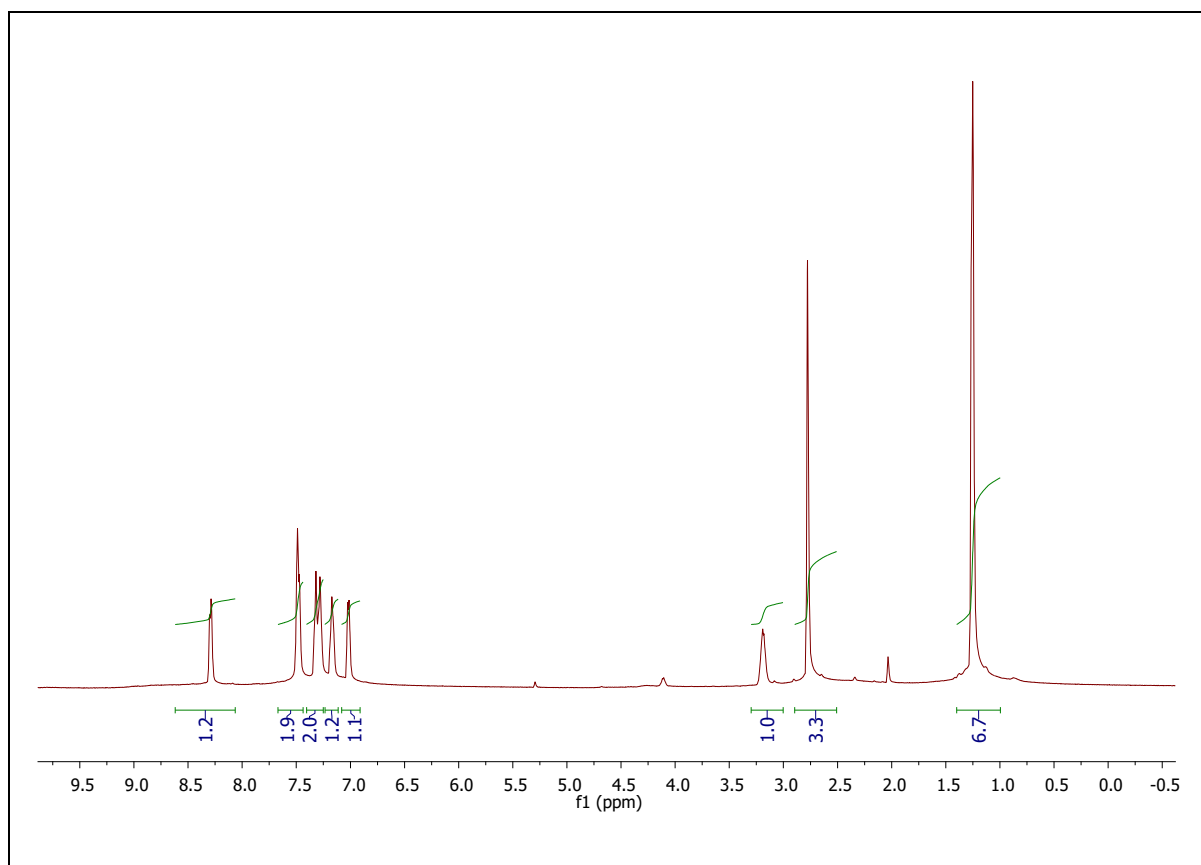

**Figure S31.** <sup>1</sup>H NMR (500 MHz) spectrum of the AQQ8 in CDCl<sub>3</sub>-d<sub>1</sub>.

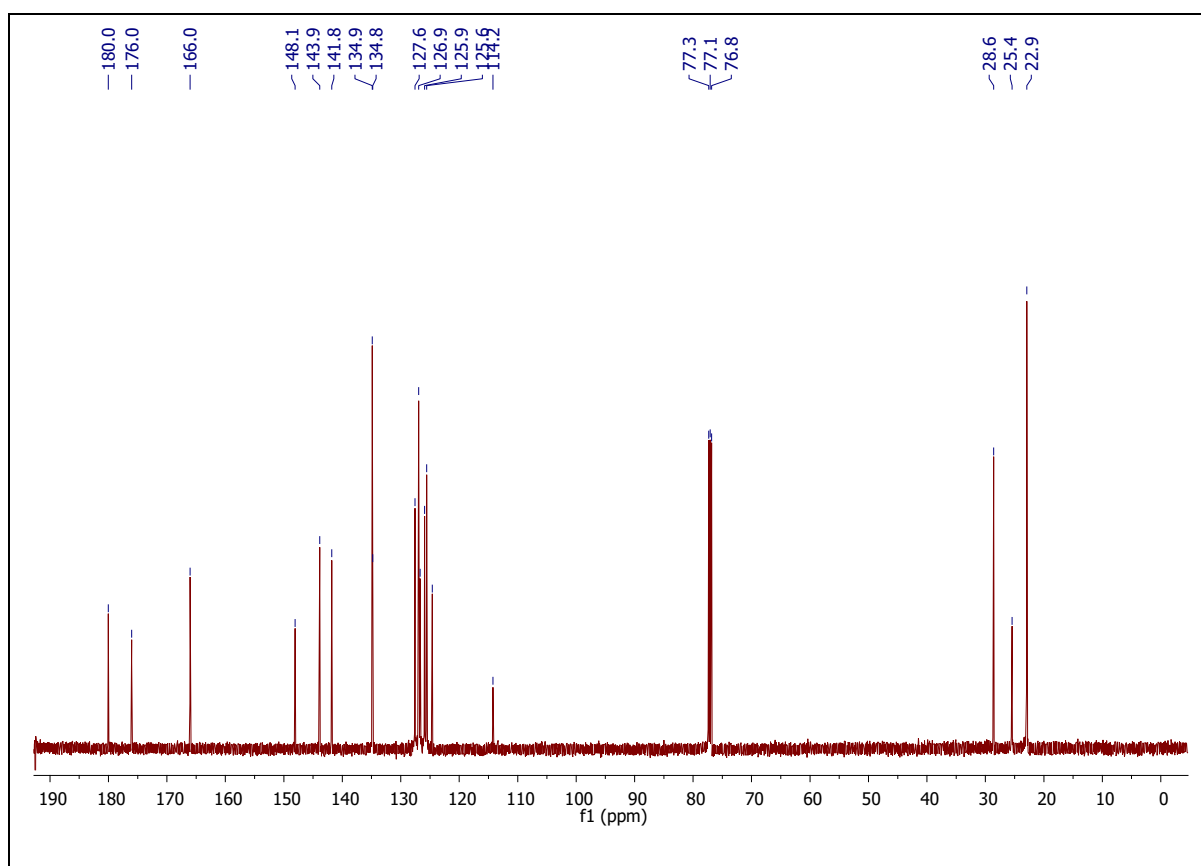

**Figure S32.** <sup>13</sup>C NMR (125 MHz) spectrum of the AQQ8 in CDCl<sub>3</sub>-d<sub>1</sub>.

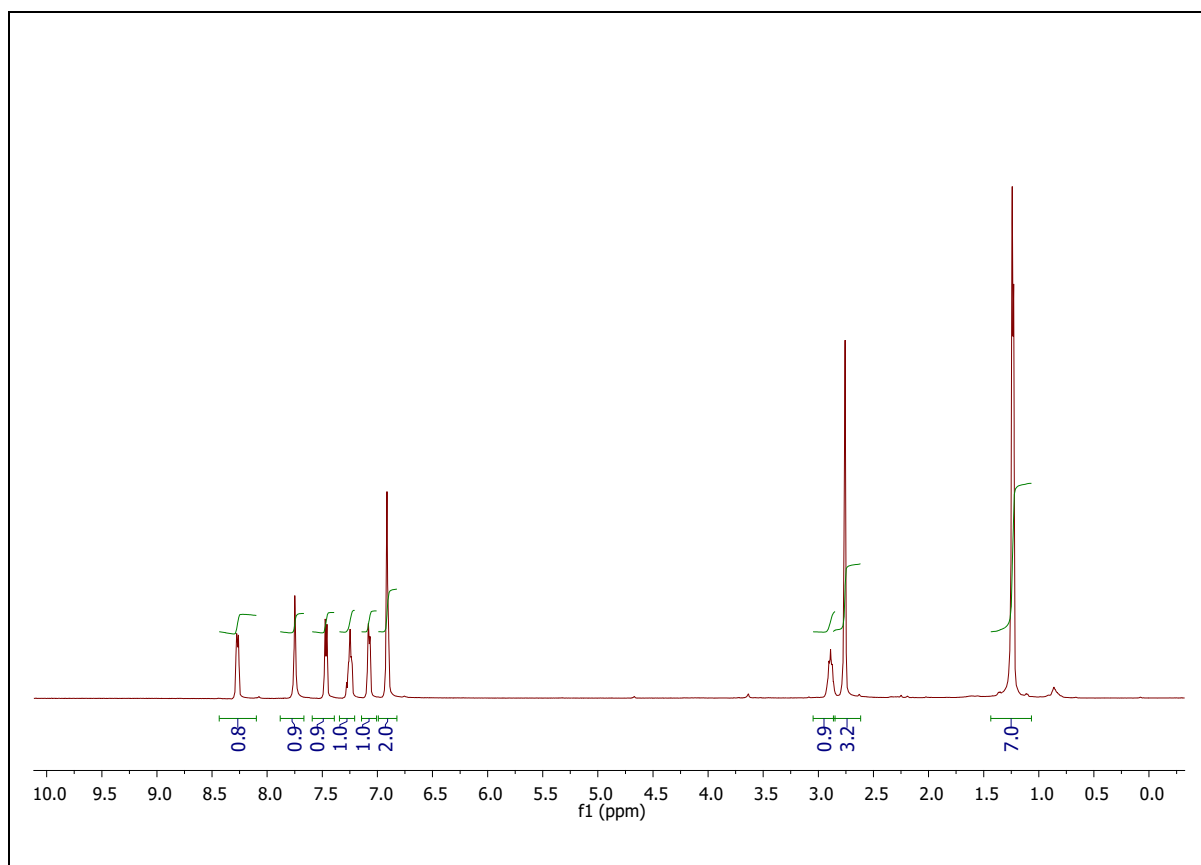

**Figure S33.** <sup>1</sup>H NMR (500 MHz) spectrum of the AQQ9 in CDCl<sub>3</sub>-d<sub>1</sub>.

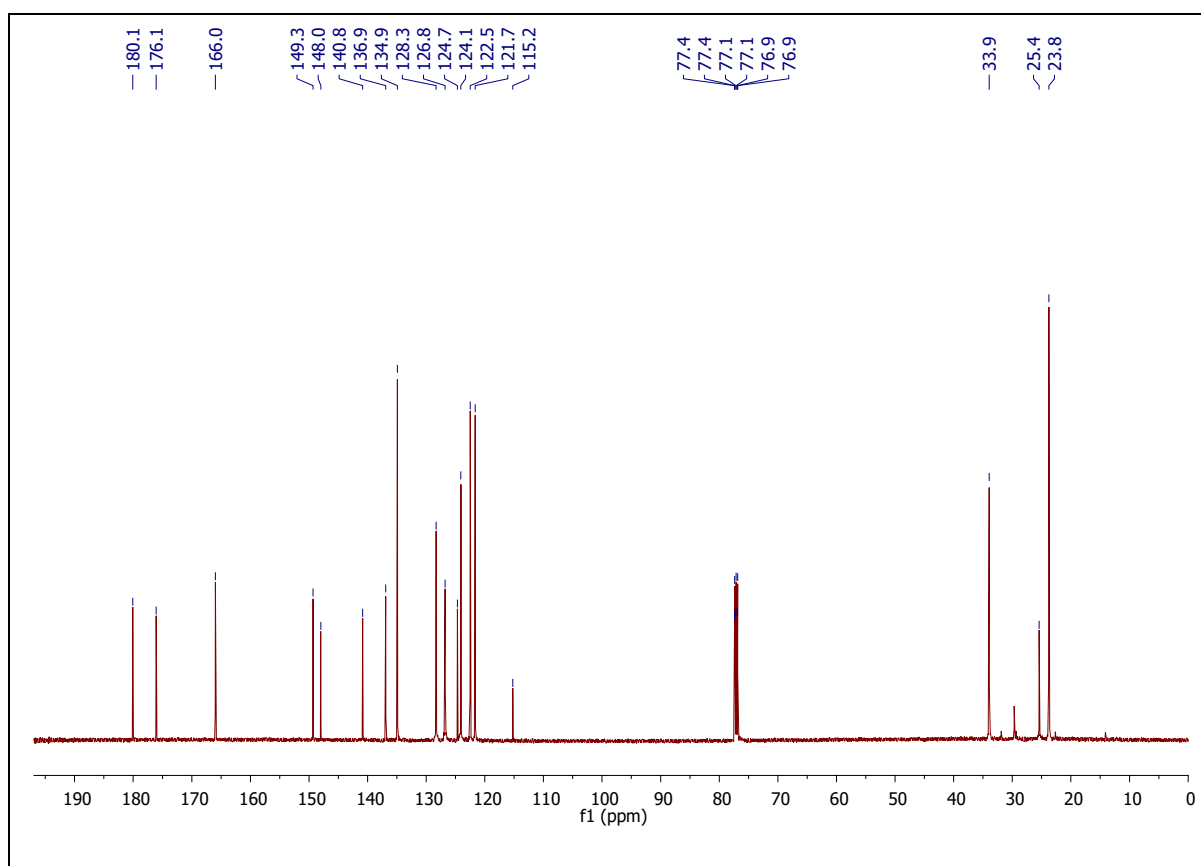

**Figure S34.** <sup>13</sup>C NMR (125 MHz) spectrum of the AQQ9 in CDCl<sub>3</sub>-d<sub>1</sub>.

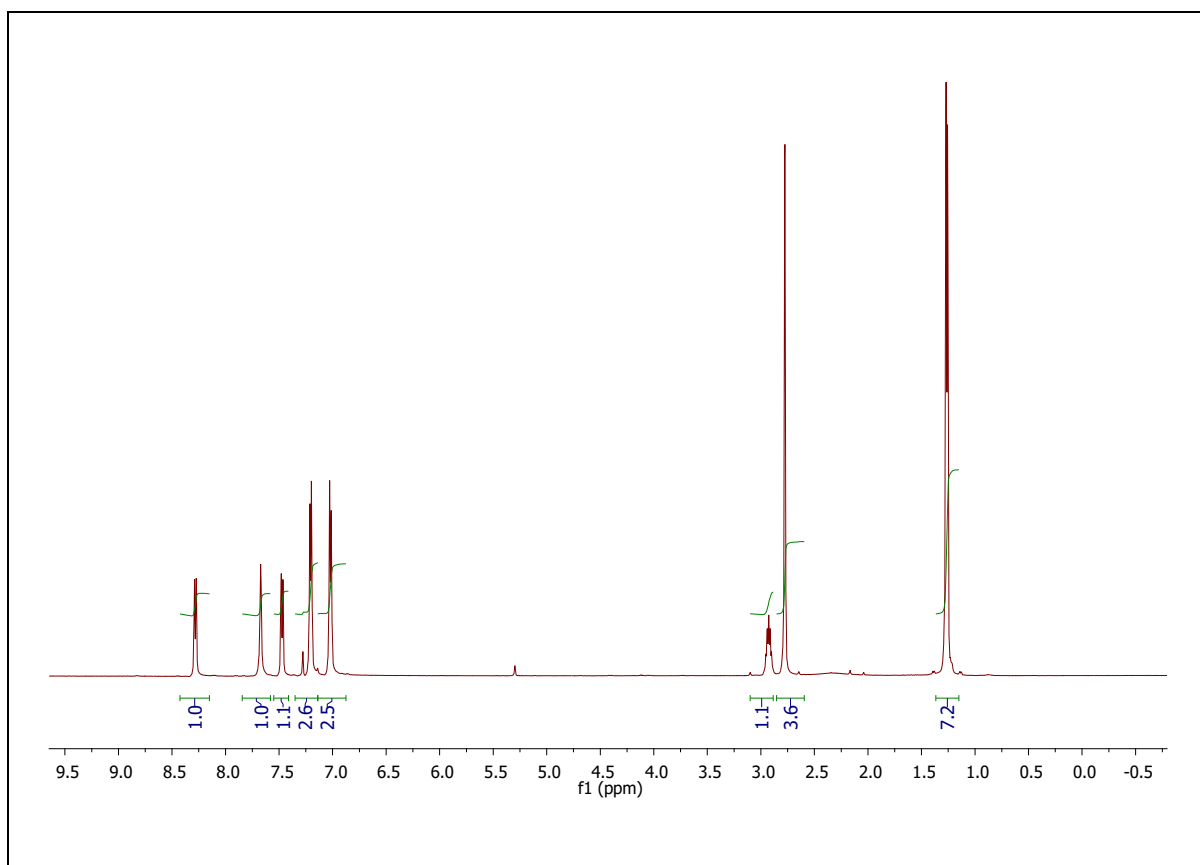

**Figure S35.** <sup>1</sup>H NMR (500 MHz) spectrum of the AQQ10 in CDCl<sub>3</sub>-d<sub>1</sub>.

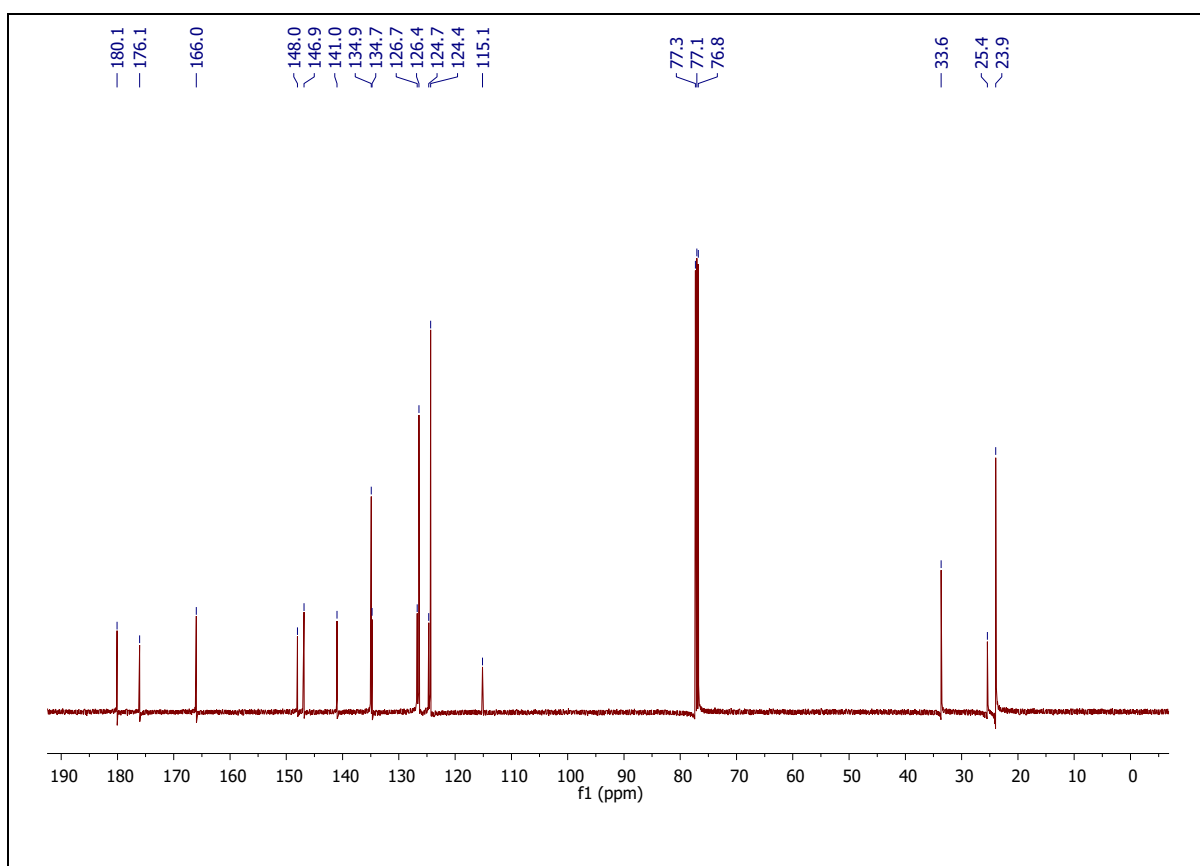

**Figure S36.** <sup>13</sup>C NMR (125 MHz) spectrum of the AQQ10 in CDCl<sub>3</sub>-d<sub>1</sub>.

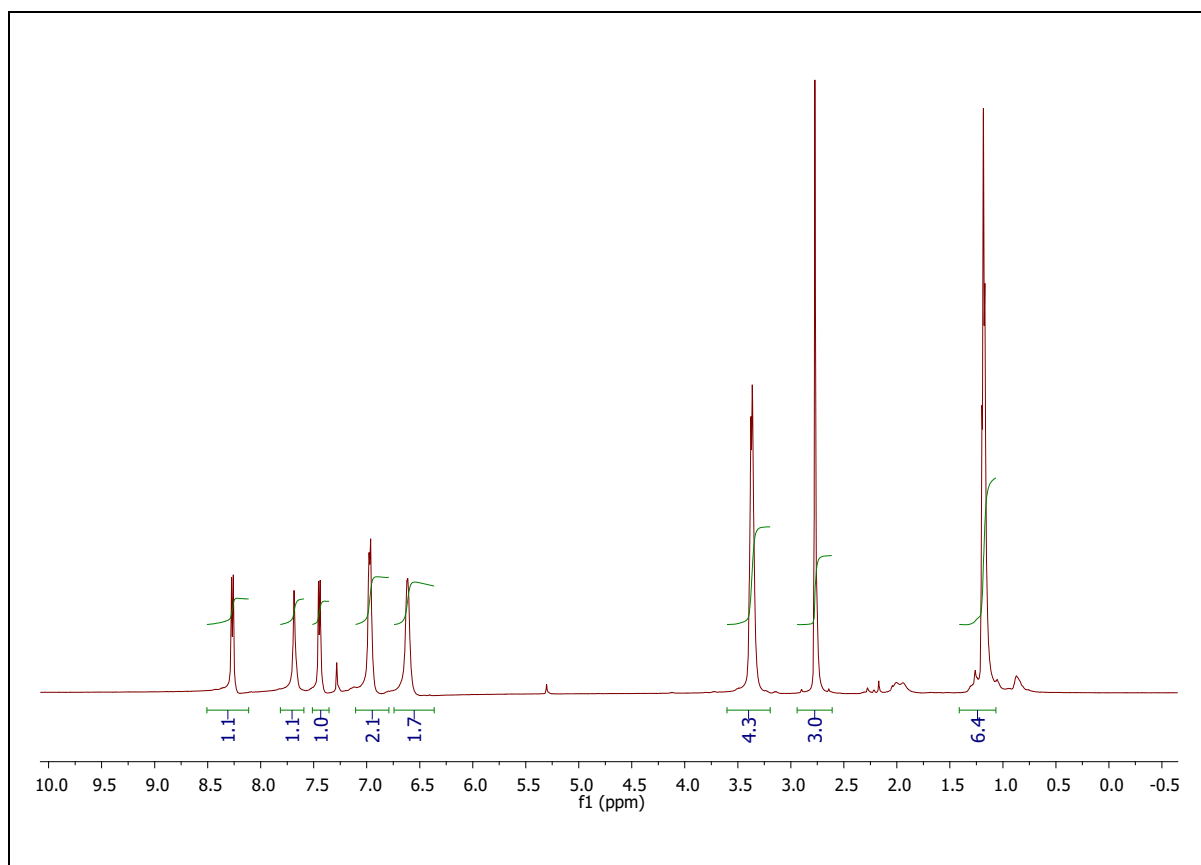

**Figure S37.** <sup>1</sup>H NMR (500 MHz) spectrum of the AQQ11 in CDCl<sub>3</sub>-d<sub>1</sub>.

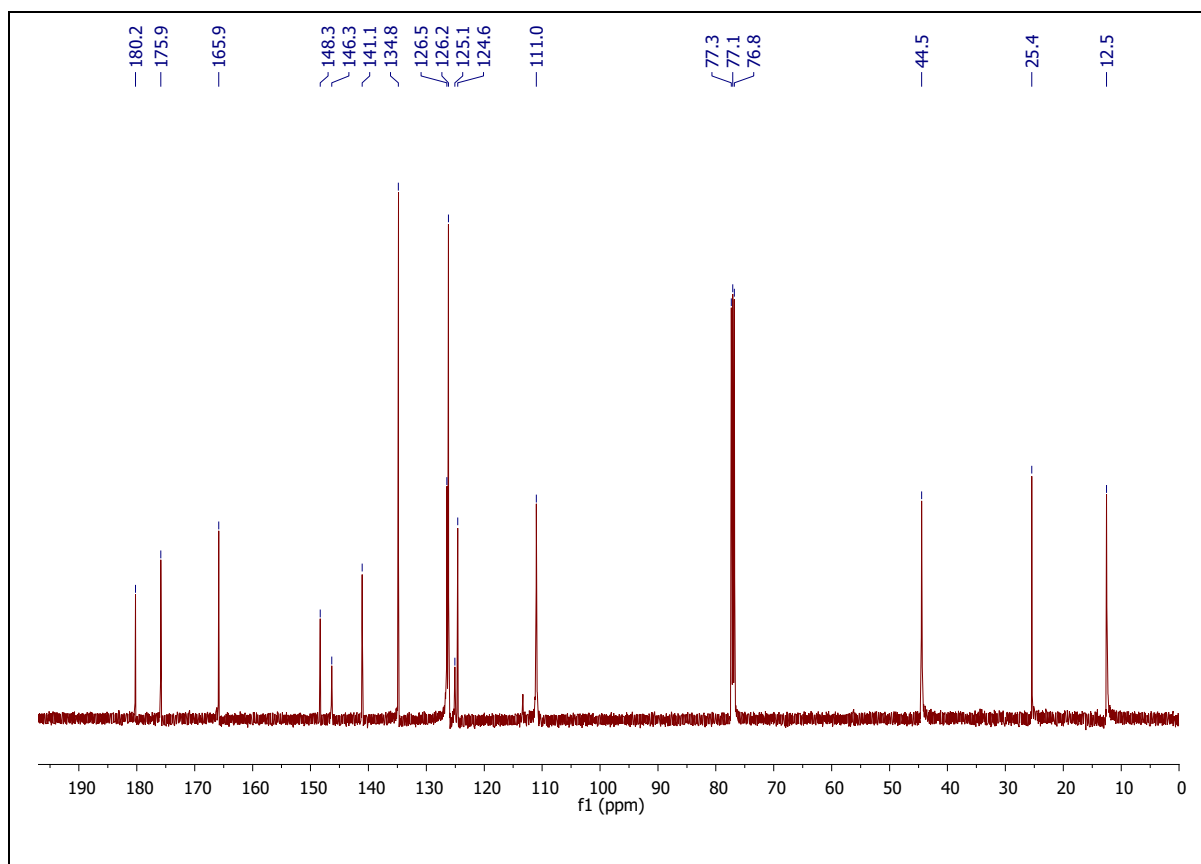

**Figure S38.** <sup>13</sup>C NMR (125 MHz) spectrum of the AQQ11 in CDCl<sub>3</sub>-d<sub>1</sub>.

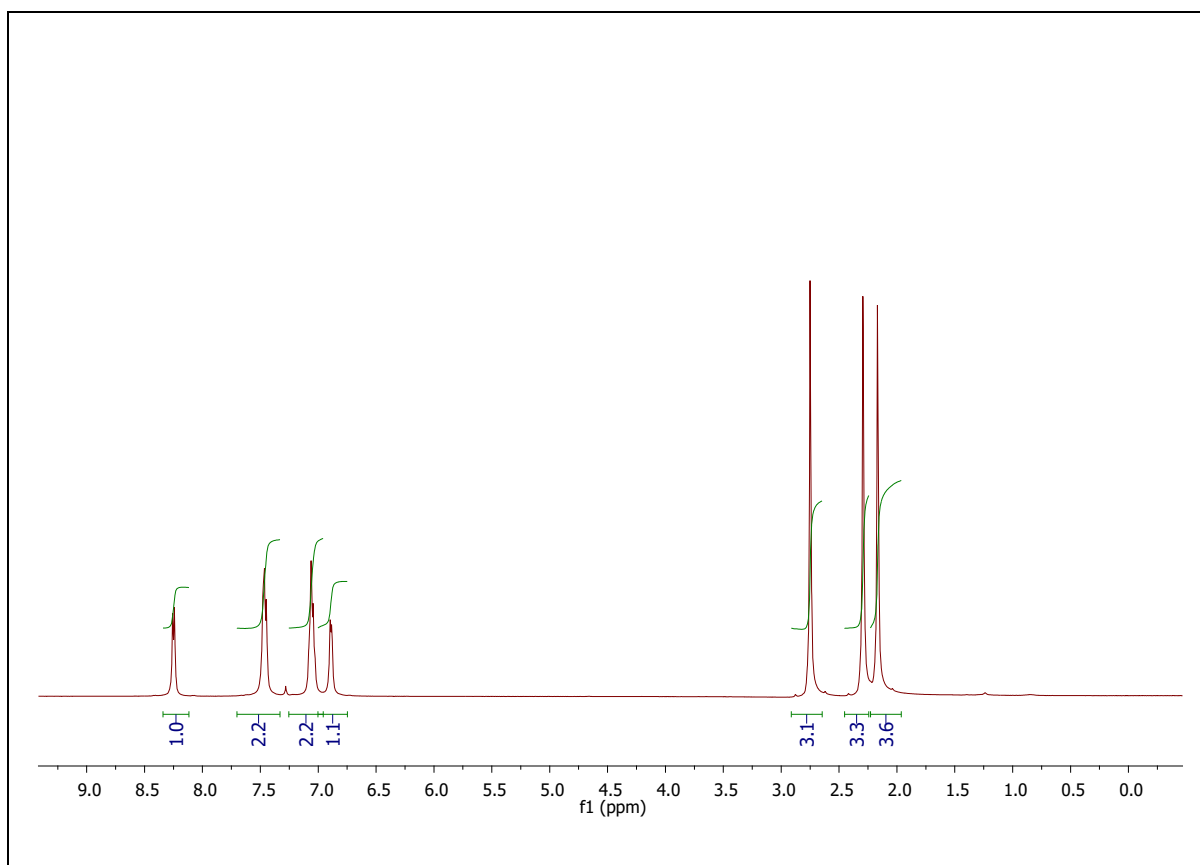

**Figure S39.** <sup>1</sup>H NMR (500 MHz) spectrum of the AQQ12 in CDCl<sub>3</sub>-d<sub>1</sub>.

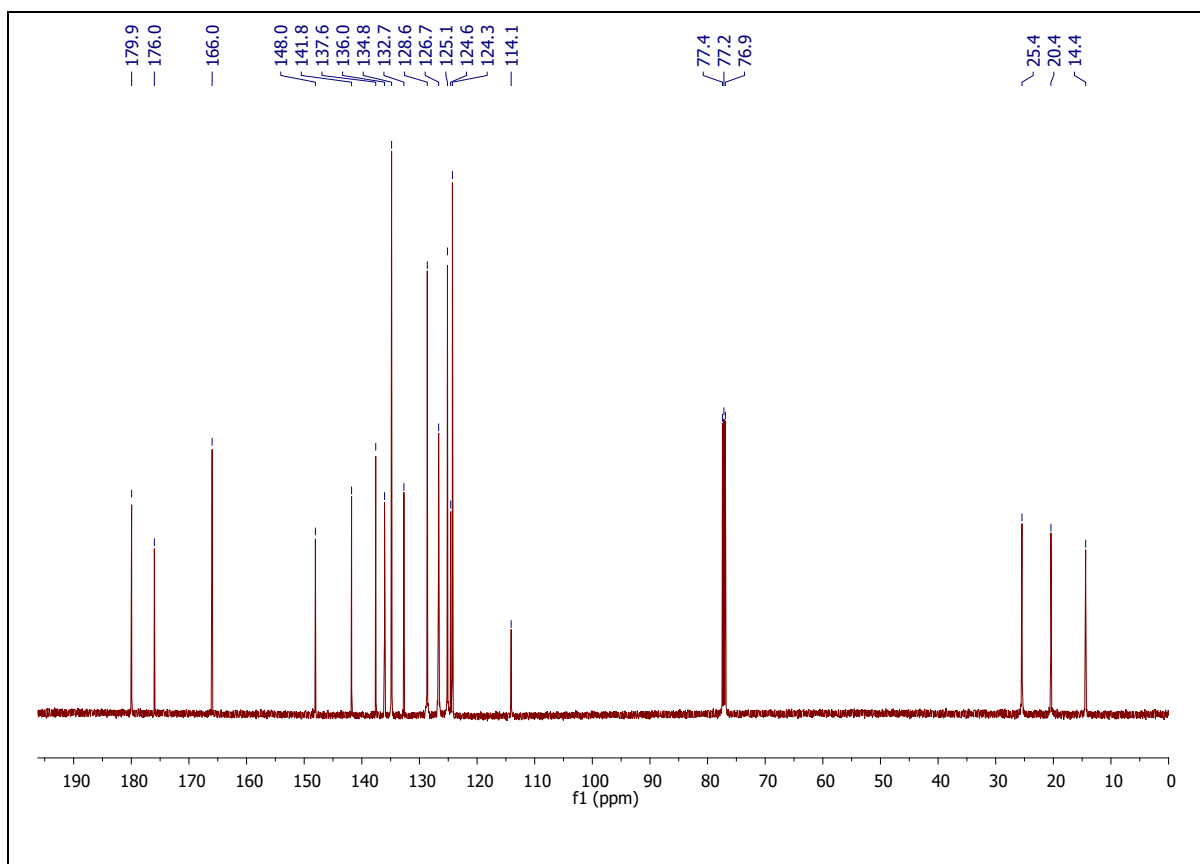

**Figure S40.** <sup>13</sup>C NMR (125 MHz) spectrum of the AQQ12 in CDCl<sub>3</sub>-d<sub>1</sub>.



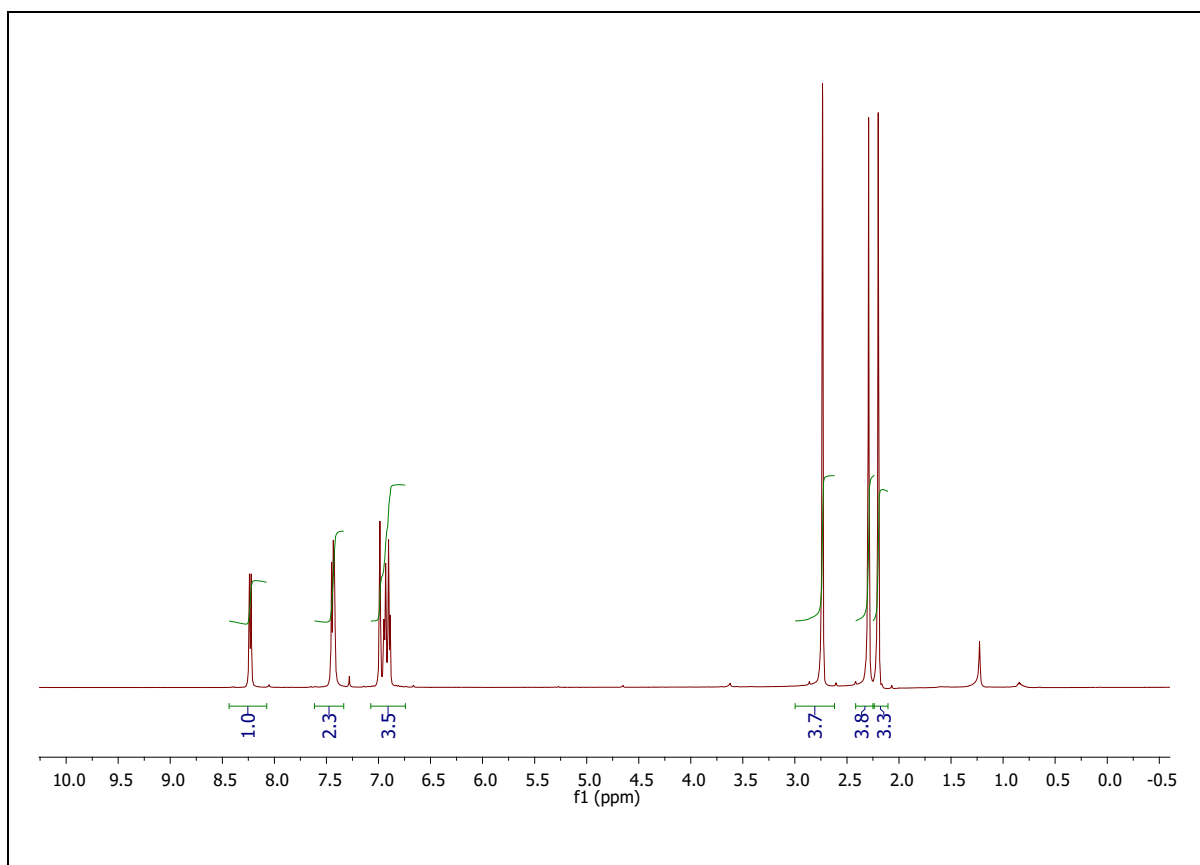

**Figure S41.**  $^1\text{H}$  NMR (500 MHz) spectrum of the **AQQ13** in  $\text{CDCl}_3-d_1$ .

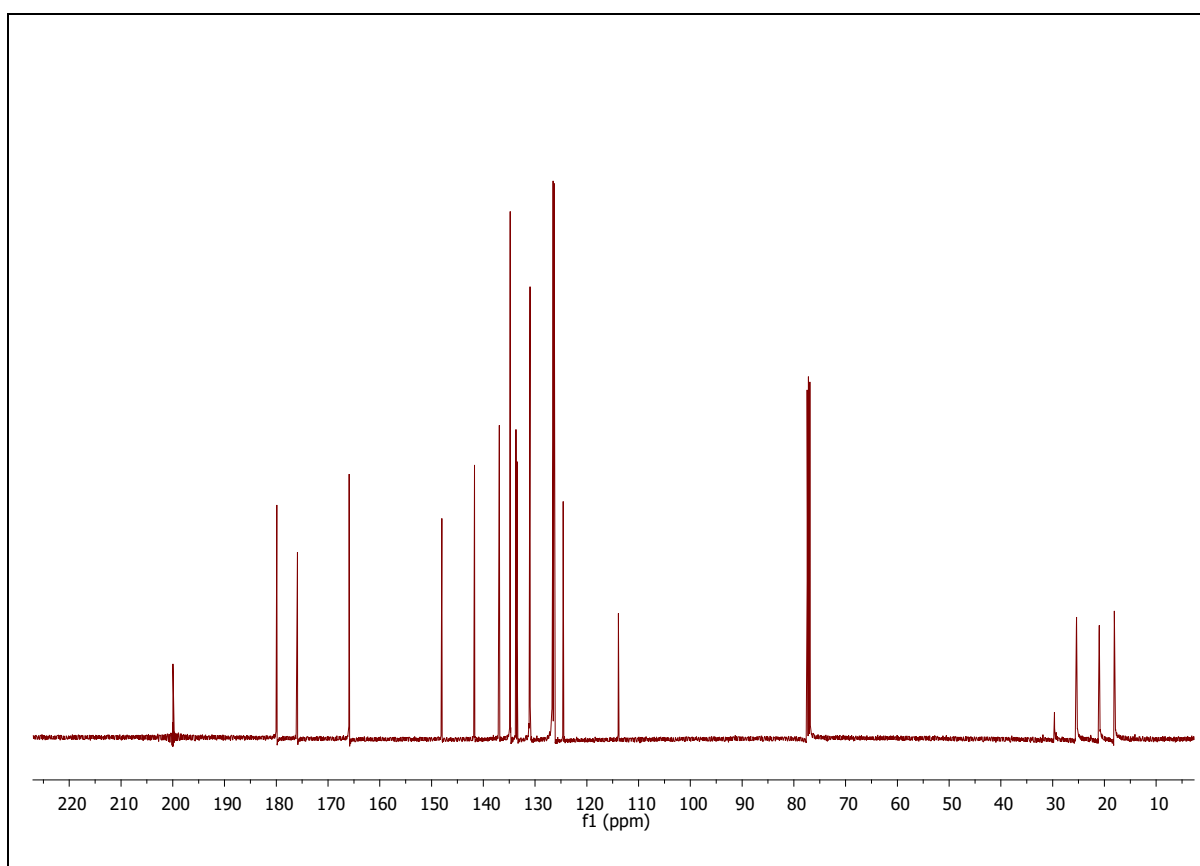

**Figure S42.**  $^{13}\text{C}$  NMR (125 MHz) spectrum of the **AQQ13** in  $\text{CDCl}_3-d_1$ .

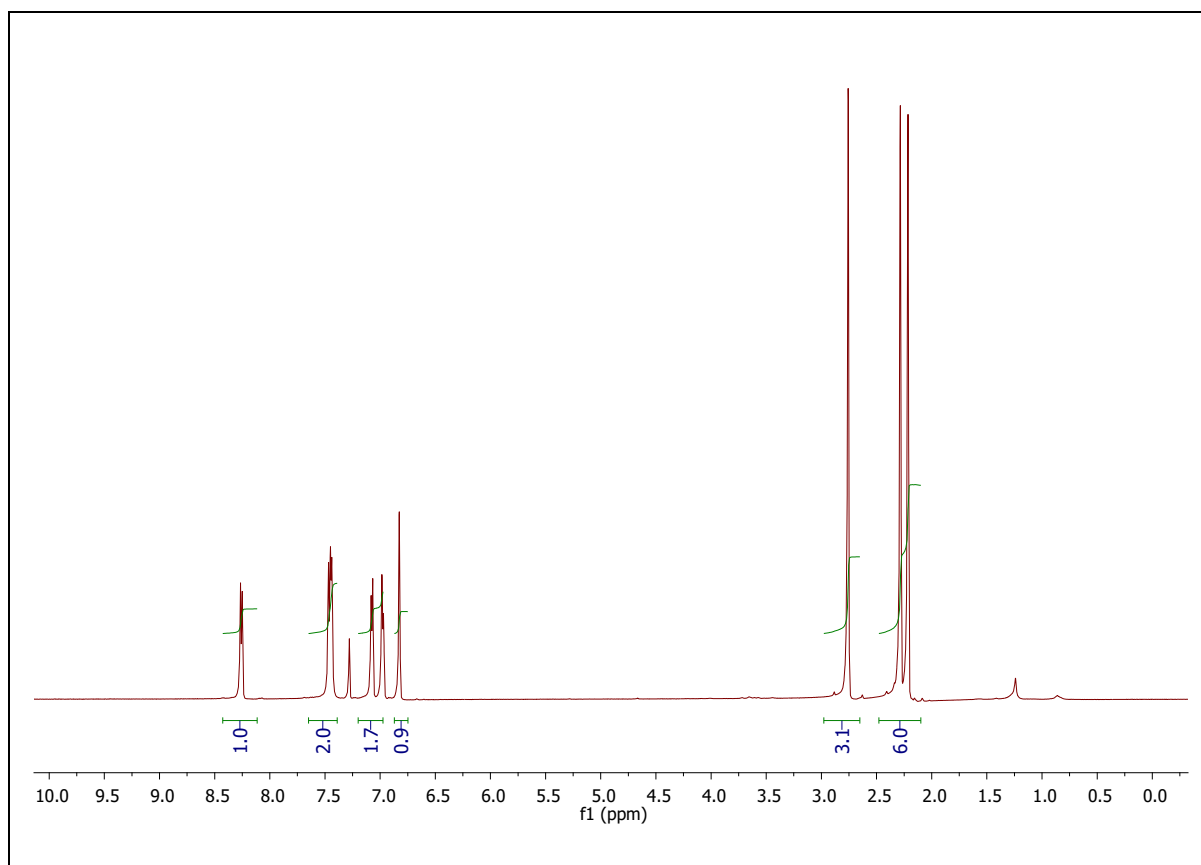

**Figure S43.** <sup>1</sup>H NMR (500 MHz) spectrum of the AQQ14 in CDCl<sub>3</sub>-d<sub>1</sub>.

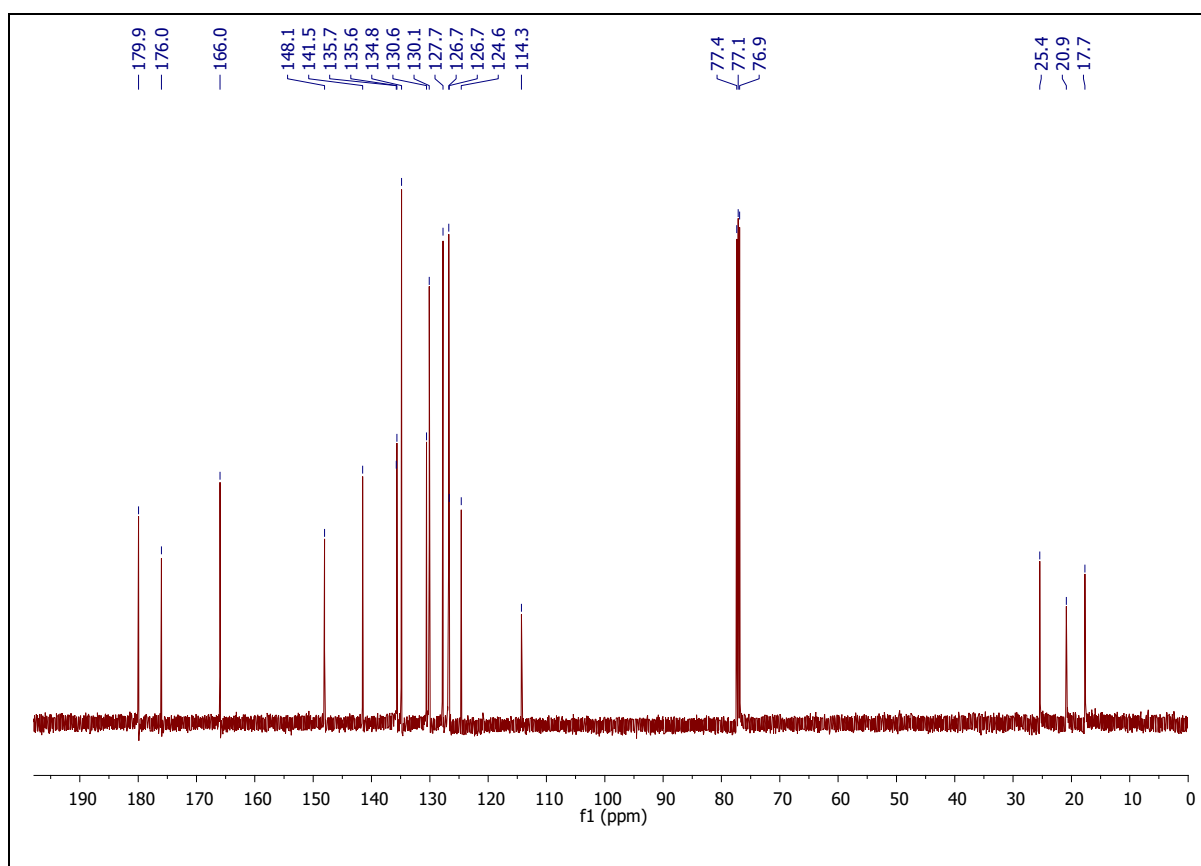

**Figure S44.** <sup>13</sup>C NMR (125 MHz) spectrum of the AQQ14 in CDCl<sub>3</sub>-d<sub>1</sub>.

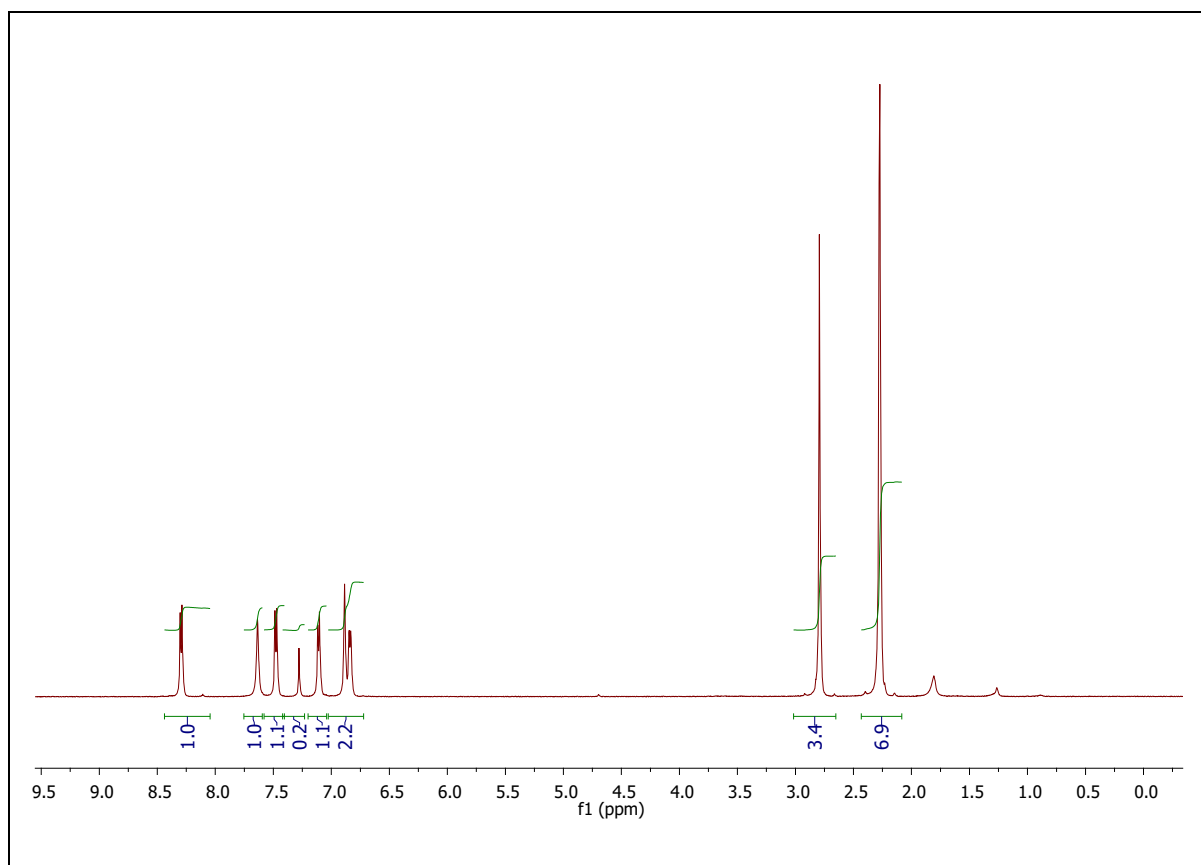

**Figure S45.** <sup>1</sup>H NMR (500 MHz) spectrum of the AQQ15 in CDCl<sub>3</sub>-d<sub>1</sub>.

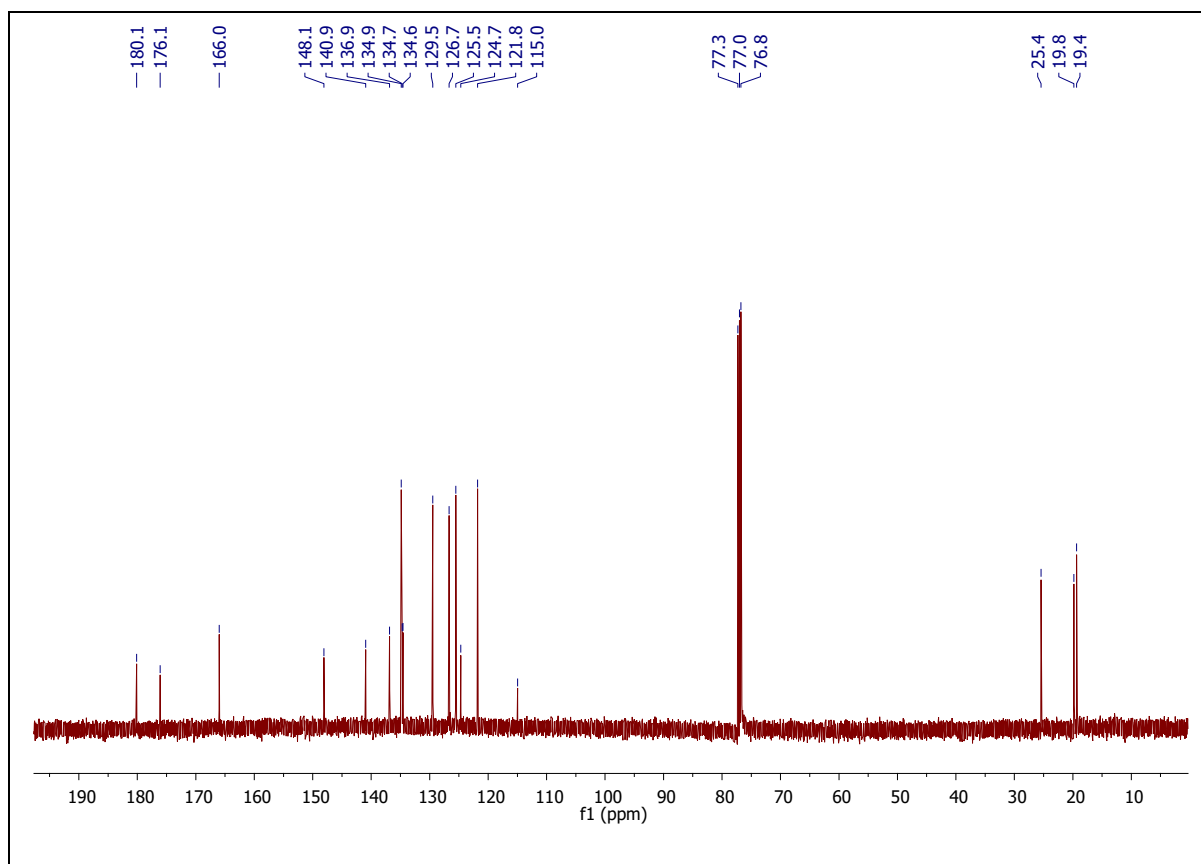

**Figure S46.** <sup>13</sup>C NMR (125 MHz) spectrum of the AQQ15 in CDCl<sub>3</sub>-d<sub>1</sub>.

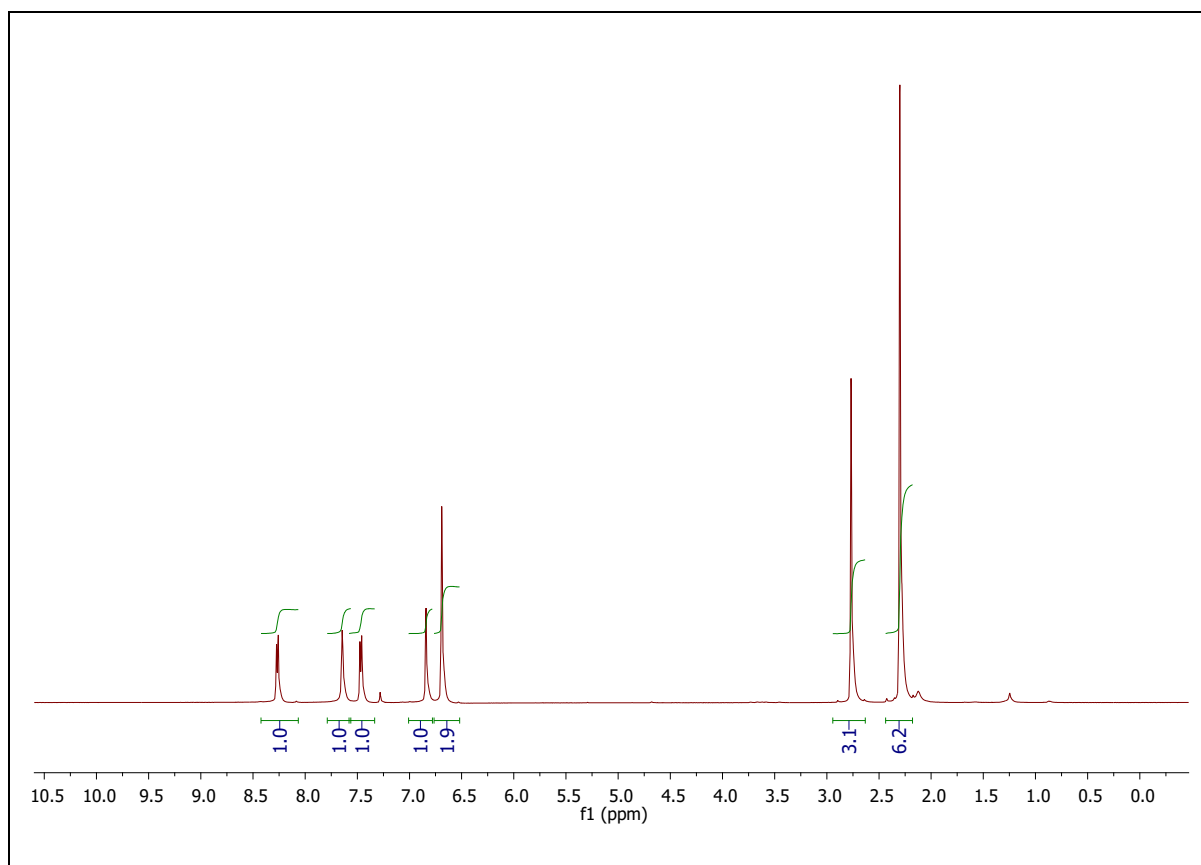

**Figure S47.** <sup>1</sup>H NMR (500 MHz) spectrum of the AQQ16 in CDCl<sub>3</sub>-d<sub>1</sub>.

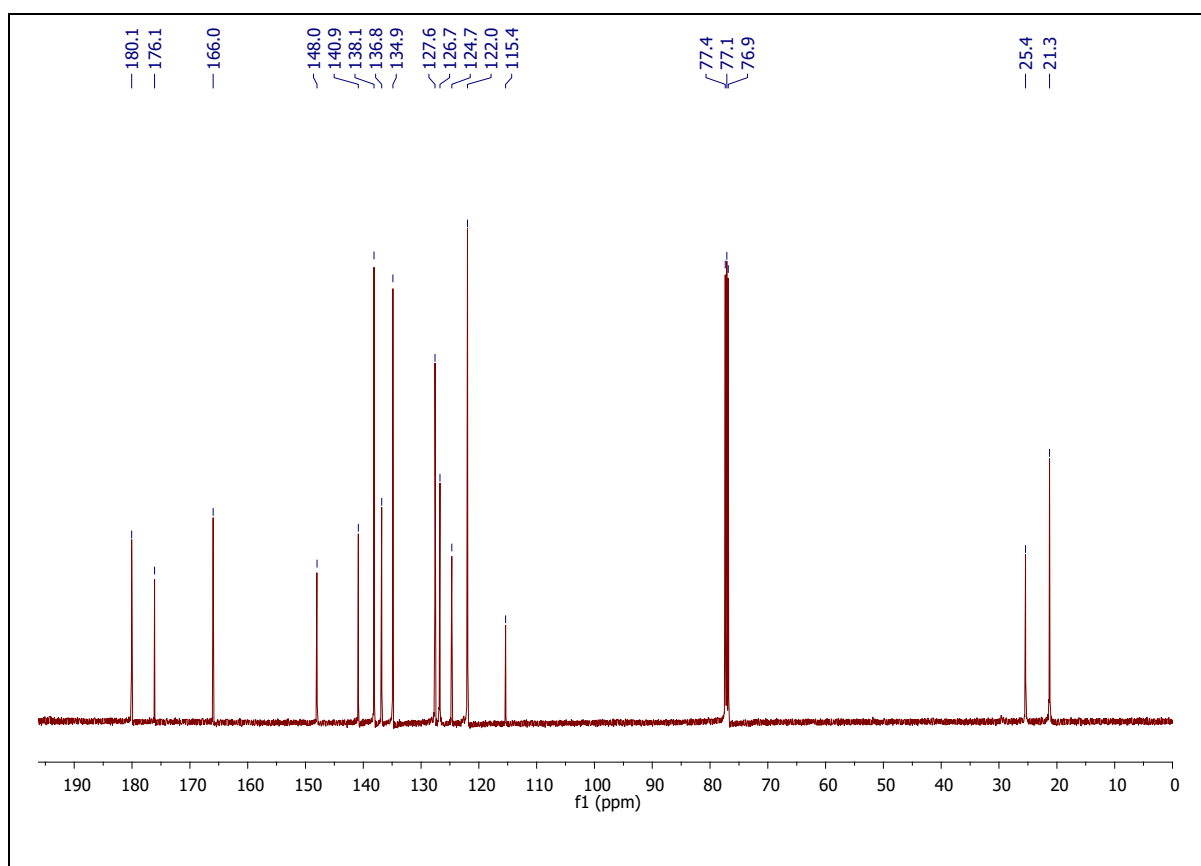

**Figure S48.** <sup>13</sup>C NMR (125 MHz) spectrum of the AQQ16 in CDCl<sub>3</sub>-d<sub>1</sub>.
